# Supplementary material for: Accurate whole human genome sequencing using reversible terminator chemistry
Source: Springer Nature journal article supplement (doi:10.1038/nature07517), 2008-11-01
Supplement: 41586_2008_BFnature07517_MOESM91_ESM.pdf [file 41586_2008_BFnature07517_MOESM91_ESM.pdf]

## Experimental methods

### *Preparation of DNA*

DNA for a bacterial artificial chromosome (bCX98J21) clone was prepared from a single colony by standard alkaline extraction method and purified by equilibrium density gradient fractionation using standard procedures. X chromosome DNA was prepared by flow-sorting X chromosomes from a culture of human lymphoblastoid cell line GM07340. Cells were arrested in metaphase using demecolcine, harvested, treated with hypotonic solution, transferred to polyamine isolation buffer for lysis. Chromosomes were harvested, stained overnight with Hoechst and Chromomycin A3 (both Sigma) and analysed on a flow cytometer (MoFlo®, DAKO) equipped with two Innova 300 series lasers (Coherent). Approximately 1.3 million chromosomes were collected and treated with proteinase K and sodium lauroyl sarcosine followed by phenylmethylsulphonyl fluoride, before recovering DNA by precipitation<sup>34</sup>.

Samples of human genomic DNA NA07340 and NA18507 were obtained from Coriell Repositories, Camden NJ, USA.

### *Construction of short insert single- and paired-end libraries*

Purified DNA (50 ng – 5 ug) was fragmented (6 minutes at 32 psi) through a disposable nebulizer (Invitrogen) and purified on a single Qiaquick column (Qiagen). Recovered DNA was repaired using a cocktail of T4 DNA polymerase, DNA polymerase (large fragment) and T4 polynucleotide kinase (all enzymes from New England Biolabs) and then treated with Klenow fragment (3' to 5' exo<sup>-</sup>) in the presence of 0.2 mM dATP to add a dAMP to the 3' ends of the fragments. A single adaptor was ligated to the ends of the DNA. Adapters for the preparation of single read libraries comprised the oligonucleotides:

5'ACACTCTTCCCTACACGACGCTCTTCCGATC<sub>x</sub>T (x = phosphorothioate bond) and 5'-phosphate-GATCGGAAGAGCTCGTATGCCGTCTTCTGCTTG. The adapters for the preparation of paired read libraries comprised an alternative set of two oligonucleotides: 5'ACACTCTTCCCTACACGACGCTCTTCCGATC<sub>x</sub>T (x = phosphorothioate bond) and 5'-phosphate-GATCGGAAGAGCGGTTTCAGCAGGAATGCCGAG. Ligation products in the

desired size range were gel-purified and amplified with 6-18 cycles of PCR using Phusion High-Fidelity system (New England Biolabs) and the appropriate primers: for single read libraries: 5'-CAAGCAGAAGACGGCATAACGAGCTCTTCCGATC<sub>x</sub>T and 5'-

AATGATACGGCGACCACCGAGATCTACACTCTTTCCCTACACGACGCTCTTCCGATC<sub>x</sub>T; and for paired-read libraries: 5'-

CAAGCAGAAGACGGCATAACGAGATCGGTCTCGGCATTCTGCTGAACCGCTCTTCCGATC<sub>x</sub>T and 5'-

AATGATACGGCGACCACCGAGATCTACACTCTTTCCCTACACGACGCTCTTCCGATC<sub>x</sub>T (x = phosphorothioate bond resistant to excision by 3'-5' exonucleases).

These primers include the sequences that anneal to the complementary oligonucleotides bound to the flowcell surface, plus the sequencing primer sites. Samples were diluted to a concentration of 10 nM in 10 mM Tris pH 8.5 and 0.1% Tween 20 prior to cluster formation (see below).

#### *Construction of long range paired end libraries*

Purified DNA (10 ug) was fragmented (30 seconds at 7.5 psi) through a disposable nebulizer (Invitrogen). The recovered DNA was end repaired and the 3' ends labelled using a mixture of biotin-dNTPs (PerkinElmer), dNTPs and end repair enzymes (as described above). 2 kb DNA fragments were gel purified and circularised using T3 DNA ligase (Enzymatics). The linear DNA was removed using Plasmid Safe (Epicentre) and the circular DNA fragmented by nebulization (6 minutes at 32 psi). The recovered DNA was end repaired, dAMP tailed and the ends of the DNA ligated to the paired-read adapters (see above). Biotinylated fragments were purified on M280 streptavidin beads (Dyna). The DNA was amplified from the beads using Phusion High-Fidelity system (New England Biolabs) and the appropriate primers for paired-read libraries (as described above) (see fig 1d). Library fragments in the desired size range (400-600 bp) were gel purified and diluted for cluster formation.

#### *Preparation of flowcells*

Glass 8-channel flow cells (Silex Microsystems, Sweden) were thoroughly washed and then coated for 90 min at 20°C with 2% acrylamide containing ~3.9 mg/ml *N*-(5-bromoacetamidylpentyl) acrylamide, 0.85 mg/ml tetramethylethylenediamine (TEMED) and 0.48 mg/ml potassium persulfate (K<sub>2</sub>S<sub>2</sub>O<sub>8</sub>). Flow cell channels were

rinsed thoroughly before further use. The coated surface was then functionalised by reaction for 1 hour at 50°C with a mixture containing 0.5 uM each of two priming oligonucleotides in 10 mM potassium phosphate buffer pH 7; either A and B for single read experiments or C and D for paired read experiments (see below for sequences). Grafted flow cells were stored in 5xSSC until required.

#### *Cluster creation for single read experiments*

Cluster creation was carried out using an Illumina Cluster Station. To obtain single stranded templates, adapted DNA was first denatured in NaOH (to a final concentration of 0.1M) and subsequently diluted in cold (4 °C) hybridisation buffer (5x SSC + 0.05 % Tween 20) to working concentrations of 2 – 4 pM, depending on the desired cluster density / tile. 85 ul of each sample were primed through each lane of a flowcell at 96°C (60 ul / min). The temperature was then slowly decreased to 40 °C at a rate of 0.05 °C/sec to enable annealing to complementary adapter oligonucleotides immobilised on the flowcell surface (oligo ‘A’: 5’-PS-TTTTTTTTTT-(diol)3-AATGATACGGCGACCACCGA-3’; oligo ‘B’: 5’-PS-TTTTTTTTTTCAAGCAGAAGACGGCATAACGA-3’). Hybridised template strands were extended using Taq polymerase to generate their surface-bound complement. The samples were then denatured using formamide to remove the initial seeded template. The remaining single stranded copy was the starting point for cluster creation. Clusters were amplified under isothermal conditions at 60 °C for 35 cycles using Bst polymerase for extension and formamide for denaturation during each cycle (see fig 1b). Clusters were washed with storage buffer (5x SSC) and either stored at 4 °C or used directly.

#### *Cluster creation for paired read experiments*

Paired read flowcells contained the two oligonucleotides oligo ‘C’: 5’-PS-TTTTTTTTTTAATGATACGGCGACCACCGAGAUCTACAC-3’ (U = 2-deoxyuridine) and oligo ‘D’: 5’-PS-TTTTTTTTTTCAAGCAGAAGACGGCATAACGAGoxoAT-3’, (Goxo = 8-oxoguanine) immobilised on the surface in a ratio C:D = 1:1. Other than the use of a paired-end specific library, cluster creation was the same as described above.

### *Processing of clusters for single read experiments*

Linearisation of surface-immobilised complementary oligonucleotide 'A' was achieved by incubation with linearization mix (100 mM sodium periodate, 10 mM 3-aminopropan-1-ol, 20 mM Tris pH 8.0, 50 % v/v formamide) for 20 minutes at 20 °C followed by a water wash. All exposed 3'-OH termini of DNA, either from the extended template or unextended surface oligonucleotides were blocked by dideoxy chain termination using a terminal transferase and ddNTPs. Linearised and blocked clusters were denatured with 0.1M NaOH prior to hybridisation of the sequencing primer (see fig 1c). Processed flowcells were transferred to the Illumina Genome Analyser for sequencing.

### *Processing of clusters for paired read experiments*

For read 1, linearisation of surface immobilised oligonucleotide 'C' to retain strand 1 of each cluster was achieved by incubation with USER enzyme (as shown above). After blocking, clusters were denatured with 0.1M NaOH prior to hybridisation of the read 1 specific sequencing primer (5'-ACACTCTTCCCTACACGACGCTCTCCGATCT -3'). Processed flowcells were transferred to the Illumina Genome Analyser for sequencing.

Following the successful completion of sequencing of read 1 on the Genome Analyser, flowcells remained mounted and were automatically prepared for read 2 *in situ* using the Illumina Paired End module (according to operating manual). Clusters were denatured with 0.1 M NaOH to remove the products of read 1. Clusters were 3'-dephosphorylated using T4 polynucleotide kinase, and the strand that had been linearised as part of the read 1 preparation was re-synthesized isothermally as previously described for cluster creation. Linearisation to remove strand 1 of the re-synthesised clusters was achieved by the excision of 8-oxoguanine from oligo 'D' using Fpg (formamidopyrimidine DNA glycosylase, New England Biolabs). Linearised and blocked clusters were denatured with 0.1M NaOH prior to hybridisation of the read 2 specific sequencing primer (5'-CGGTCTCGGCATTCTGCTGAACCGCTCTCCGATCT -3')(see fig 1c).

### *Sequencing on the Genome Analyser.*

All sequencing runs were performed as described in the Illumina Genome Analyser operating manual. Flowcells were sequenced using standard recipes (see User Guide) in order to generate 25 and 35 base single and paired reads. Typically a single read run producing 1-2 Gb of PF data required 72 hours; paired read runs required approximately 150 hours including the time taken for automated preparation of the template for the second read.

## Data Analysis

### *Image analysis*

The image analysis program (Firecrest) first identifies the position of the DNA clusters on the images taken from the first sequencing cycle. Each initial image was band-pass filtered to remove background fluorescence and large-scale structure on the image, as well as enhance the signal-to-noise. Cluster positions were identified from a search for local maxima on the filtered image. Because of the finite accuracy of the movements of the motion stage, images taken at different sequencing cycles have random translational offsets with respect to each other. Furthermore, images taken in different frequency channels have different optical paths and wavelengths and experience further, albeit smaller, translations and scale transformations. In order to correct for the image shifts and scalings, the cluster positions that were extracted from the four images taken in the first cycle were super-imposed to construct a 'reference image' containing all detected clusters. Transformations of the image coordinates to later cycles were then obtained from a cross-correlation of the images in later cycles to the reference image. In this way, we obtained a set of four intensity measurements for each cluster and sequencing cycle. These series of intensities for each cluster are analogous to the intensity traces from Sanger sequencing. In addition to estimates of the intensities, the image analysis also extracts an estimate of the local noise or image background dispersion around the cluster for each image.

### *Base calling*

The signals detected for the four different dye-labelled dNTPs are not independent, as the emission spectra of their dyes and the transmission and detection frequency windows may overlap between nucleotides. The relative intensities and cross-talk are described by a frequency cross-talk matrix, which characterises the intensity response

of the system to each nucleotide. We developed a method to auto-calibrate this matrix from the intensity traces and apply a correction to the extracted intensities. Because the rates of phasing and prephasing were small and consistent, the resulting intensity dissipation into different frequency cycles was also small and the accumulated loss roughly linear. Therefore we estimated phasing and prephasing rates by measuring the build-up of correlated signal between different cycles over early sequencing cycles. From these rates we derived the expected correlation of signals for each cycle and de-correlated them. The end result of these computations was a set of matrix-corrected, phasing-corrected intensity values for each cluster, from which we took whichever of the four channels gave the highest value at a given cycle to be the base call for that cycle.

#### *Purity filtering*

In order to discriminate between good reads without errors and reads derived from mixed clusters that overlap their nearest neighbours, we defined a measure of signal purity at a given cycle by taking the brightest of the four corrected intensities at that cycle as a fraction of the sum of the brightest and next brightest intensities. We discarded all reads whose corrected brightest intensity in any of the first 12 sequencing cycles was less than 60% of the sum of brightest intensity and the next brightest. We find that this criterion provides reasonable discrimination between good and bad data. Depending on the loading density, we typically kept between 50% and 70% of the raw reads. All figures quoted for accuracy and yield per flowcell refer only to this purity-filtered subset of the raw data.

#### *Quality scoring of bases*

The base caller (Bustard) provides a first estimate of the uncertainty of the base call. This is computed by propagating the noise estimates from the image analysis and integrating the resulting likelihood functions to obtain probability estimates for each of the four possible base calls. The probability estimates are transformed to scores by first converting to a log-odds scale via the formula  $Q=10\log_{10}(p(X)/(1-p(X)))$ , where  $p(X)$  for A,C,G,T is the estimated probability of the base call being X, and then rounding to integers. This scoring scheme can be thought of as a generalization of the scoring scheme made popular by the Phred base caller<sup>10</sup> ( $Q=-10\log_{10}(p_{\text{error}})$ , where  $p_{\text{error}}$  is the probability of an incorrect base), in that the highest of the four scores - that of the called base - is

---

asymptotic to the Phred score, but the scheme also enables meaningful integer scores to be assigned to the three non-called bases.

This initial base quality estimate is refined by an implementation of the Phred algorithm, taking as predictors the initial confidence score for the called base together with the sequencing cycle, the purity of the called base and the minimum purity over the first 12 bases of the read. The sequence data for each flowcell lane in an experiment can be used as a training set for the same lane, with the alignment to the reference being used to determine whether or not a base is correct. Since a lane may produce several hundred million base pairs, each lane contains enough data to serve as a reasonable training set. After this procedure, the observed error rate for each base closely matches the error rate implied by the adjusted quality score (fig S3).

This “auto-calibration” procedure was used to estimate the base quality for the X chromosome and Yoruba genome analyses. However, we note that this method will underestimate the true quality of the bases since genuine differences between the sample DNA and the reference are treated as errors by the algorithm. One way of ameliorating this effect would be to exclude from the auto-calibration all reads that overlap positions known to be highly variable in the genome being sequenced – in human DNA, dbSNP positions would be obvious candidates. An alternative method is to allow one lane of the flowcell to serve as a control by using it to sequence DNA from a sample whose reference is exactly known (we have used DNA from the bacteriophage PhiX 174RF1 for this purpose). The Phred calibration table obtained from this data is then used to recalibrate the quality scores of the bases coming from the unknown samples in the other lanes. By breaking the dependency on alignments, this method has the advantage of removing the need for any knowledge at all of the reference sequence of the sample(s) in the non-control lanes, albeit at a cost of a lane’s worth of data.

#### *PhageAlign alignment*

PhageAlign is a program for exhaustive alignment of reads of length  $k$  against a known reference. Both strands of the reference sequence are split into overlapping  $k$ -mers which are then sorted lexicographically. The reads are also sorted and then compared to each genomic  $k$ -mer in turn allowing any number of substitution errors.

Commonality of prefixes between lexicographically adjacent prefixes is exploited to minimise the number of base to base comparisons required, however its exhaustive nature renders it too slow for high-throughput alignment of datasets where either the number of reads or the size of the reference genome is large.

The principal use of PhageAlign is to enable an accurate measure of raw read error by allowing even noisy reads to participate in the error rate calculation, provided the aligner is able to find a unique best match for them in the reference.

#### *ELAND alignment*

In order to remap the sequence reads to a large reference genome, we developed a fast short-read alignment program called ELAND. The first few bases (32 by default, or the entire read length for reads shorter than this) are aligned to the genome allowing up to two substitution differences to obtain a set of candidate match positions for each read in the reference. Sequence from each of these positions is then used to extend the candidate alignments along the full length of each read. Finally base quality values are used to choose, where possible, the most probable of the candidate alignments.

For paired reads, a set of candidate alignments is obtained for each of the two reads as described above. Read pairs having a unique alignment of each read are first used to determine the nominal strand orientation and insert size distribution of the sample then, on a second pass, this information is used to resolve repeats and determine the anomalously paired reads that are possible indicators of structural variation.

#### *ELAND SNP calling*

For allele calling, we used only read pairs having alignments that were correctly oriented and that indicated a template insert size of within 3 standard deviations of the sample median. We further required a paired alignment score  $\geq 6$  (indicating the quality of the paired mapping). The basecalls and their associated quality values were sent to a Bayesian allele caller, which produced one or two allele calls and scores for each position in the genome. At each position, the allele caller computes  $\log_{10} p(\text{observed bases} \mid \text{no "A"s are present})$  and similarly for C,G and T. The highest two scores are then normalized by subtracting the third highest, thus obtaining log-odds scores for the two most probable alleles for which an increment in score of 3



approximately corresponds to an increase in coverage of a single base of Phred quality 30. SNPs were called where a non-reference base allele was observed, the allele call score was  $\geq 10$ , and the depth at this position was no greater than three times the chromosomal mean. For heterozygous calls, we additionally required both alleles to have an allele-call score  $\geq 10$  and the ratio of their scores to be  $\leq 3$ . For the reduced depth analysis (fig 5) we required an allele-call score  $\geq 6$ . We excluded SNP calls that were within 15 bp of an apparent small indel (detected as described below).

#### *ELAND structural variant detection*

Hierarchical clustering of anomalous readpairs was used to identify groupings of five or more readpairs that had a similar size and position. Read pairs were defined as anomalous if they had high-confidence alignments of each individual read that nevertheless were either incorrectly oriented or implied an insert size of at least 3 standard deviations outside the sample median. These groupings were combined with other information such as depth changes, alignability and gaps in expected coverage, and a ranking system was applied. Higher (positive) ranks were assigned where the event supporting evidence was seen; negative ranks were used for regions where it would be difficult to call variants, such as the centromere, or where contradictory evidence was seen.

Some structural variants were characterised using local *de novo* assembly. We took high quality (23 of the first 25 bases had  $\geq Q20$ ) anomalous pairs, singletons and their non-aligning partner in the region of interest and attempted an assembly using Velvet<sup>35</sup>. Contigs were aligned back to the chromosome using BLAST, in order to look for discontinuities in the alignment, indicating breakpoints.

#### *MAQ alignment*

MAQ first searches for the ungapped match with lowest mismatch score, defined as the sum of qualities at mismatching bases. To speed up the alignment, MAQ only considers positions that have 2 or fewer mismatches in the first 28bp.

Sequences that fail to reach a mismatch score threshold but whose read pair is mapped are searched with a gapped alignment algorithm in the regions defined by the read pair. To evaluate the reliability of alignments, MAQ assigns each alignment a Phred-scaled quality score which measures the probability that the true alignment is not the

one found by MAQ. MAQ always reports a single alignment, and if a read can be aligned equally well to multiple positions, MAQ will randomly pick one position and give it a mapping quality zero.

MAQ fully utilizes the read-pair information of paired reads. It is able to use this information to correct wrong alignments, to add confidence to correct alignments, and to accurately map a read to repetitive sequences if its mate is confidently aligned. With paired-end reads, MAQ also finds short insertions/deletions (indels) from the gapped alignment described above.

#### *Calculation of Mapped read depth and distribution*

For NA07340-X: After aligning the data to the reference sequence for chromosome X, the depth of mapped reads was sampled at every 50th position. The distribution of this depth is shown by the 'all' histogram in fig 2a. Then all the positions from this sample were discarded where the reference is not unique on the scale of the read length (as determined by mapping the reference to itself). The distribution of these uniquely mapped reads is shown by the 'unique' histogram in fig 2a. Comparison with the Poisson distribution having the same mean shows that there is some extra variance or overdispersion relative to the theoretical minimum.

At each of the unique positions the GC content of the reference in a surrounding window of length twice the read length was calculated. This gives an estimate of the GC content of all the reads that could have overlapped that position. Then we binned the positions by GC content, and within each bin calculated the mean depth and the 10th and 90th centiles of both the depth and a Poisson distribution with the same mean. The resulting depth-GC variation is shown in fig 2b, where the lower x-axis represents the proportion of unique reference sequence corresponding to the GC content values on the upper axis. In this plot, overdispersion at a given GC content is indicated by the Poisson 10th and 90th centile lines lying inside the shaded area at that GC value.

#### *MAQ SNP calling*

MAQ produces a consensus genotype sequence from the alignment. The consensus sequence is inferred from a Bayesian statistical model and each consensus genotype is

associated with a Phred quality which measures the probability that the consensus genotype is incorrect. Potential SNPs are detected by comparing the consensus sequence to the reference and are further filtered by a set of predefined rules. These rules are:

- i) discard SNPs within the 3bp flanking region around a potential indel;
- ii) discard SNPs covered by three or fewer reads;
- iii) discard SNPs covered by no read with a mapping quality higher than 60;
- iv) in any 10bp window, if there are 3 or more SNPs, discard them all;
- v) discard SNPs with consensus quality smaller than 20; and
- vi) discard a SNP if a base with consensus quality lower than 20 occurs within 3bp on either side of the target SNP.

#### *MAQ small indel detection*

MAQ regards an indel is reliable, if at least three reads contain the exact indel (identical position and indel size). MAQ only keeps one most evident indel in any 10bp window because close indels may indicate alignment artefacts.

#### *Genome-wide de novo assembly of unaligned reads*

*De novo* assembly was performed using Velvet<sup>35</sup> and unaligned read pairs. The read pairs were duplicate filtered and then further quality filtered to obtain the best 11,067,318 reads, to allow for computer memory limitations. Version 0.5.05 of velvet was used with a hash length of 23, a coverage cutoff of 5 and a maximum insert length of 350. The contigs were then filtered to ensure a minimum length of 100 bases.

#### *MAQ structural variant detection*

Anomalous read pairs with a mapping quality of at least 20 were ordered first by start position, then two anomalous pairs were allocated to the same cluster if they were overlapping and if their end positions were not further apart than a given threshold (mean of the insert lengths plus three times their standard deviation). This procedure was followed by merging neighbouring overlapping clusters. To obtain a final set of putative deletions, these candidate clusters were filtered for the number of read pairs per cluster (at least 5), for distance between leftmost and rightmost forward reads (distance is less than a given threshold, i.e. mean of the insert lengths plus three times their standard deviation), similarly for distance between leftmost and rightmost

reverse reads and for deletion size (greater than a given threshold, i.e. mean of the insert lengths plus three times their standard deviation); also read depth and repeat structures were considered. Putative deletions greater than 100kb were removed.

Mapped read depth was used to infer copy-number variants between the sample (NA07340) and reference sequences. At any given sequence position the depth of reads aligned by Maq is expected to be Poisson distributed, with mean determined by the copy numbers of both the sample and the reference at that position, the mean overall depth of coverage, and any GC or other biases. We constructed a Hidden Markov model with hidden states representing copy number differences between sample and reference and an emission or observed variable representing the mapped depth accounting for GC content. (We use a negative binomial distribution rather than a Poisson for the latter, to account for the overdispersion evident in fig 2b.) Standard HMM methods (e.g. ref 36) were then applied to infer the most probable sequence of copy-number states in the sample given the depth data.

### *Resembl*

Resembl is an extended version of Ensembl developed at Illumina as part of a collaborative project with EBI, Sanger and Imperial College under a UK government funded LINK framework grant. It allows storage, query and viewing of Illumina re-sequencing data in a genomic context. The human X chromosome (NA07340) and the whole human genome (NA18507) re-sequencing datasets from ELAND-based alignment data were loaded into Resembl databases and Resembl websites were used for interactive data mining and QC within Illumina.

The Resembl back-end database was designed to allow storage and retrieval of the large amounts of re-sequencing data in an efficient way. It supports paired-end alignments at high coverage, as well as per-base and summary-type data on coverage and alignability. Parsing scripts were written to pre-process sort.txt files from the build process and adapted to run on a Linux clustered environment. Import scripts were written for very large-scale data loading. A system of clustered indexes was developed to allow fast retrieval of data from multi billion record tables.

The website extensions to the Ensembl browser allow visualization of re-sequencing data in a genomic context and support easy navigation back to the raw data. Extensions were made to Ensembl's Karyotype, Map and Contig View, and a new view (called ReadView) was added for closer examination of reads. Resembl websites were set-up for browsing the X and whole human genome paired-end alignments, SNPs and structural variations, as well as coverage and alignability graphical plots. . Paired alignments are categorised into Regular and Anomalous (i.e. anomalous-gapped, misoriented, chimeras, singletons) and displayed in tracks, accordingly. Suitable colour coding is used to distinguish the different types of variation. The displayed paired alignments are also filtered according to the rules used during the pipeline analysis. Candidate structural variants are highlighted by peaks in a graphical plot within ContigView. SNPs produced from the pipeline are loaded in Resembl as a user track. All the extensions were seamlessly integrated within Ensembl, and were flexibly implemented as a plugin.

- 34 Ng, B.L. and Carter, N.P., Factors affecting flow karyotype resolution *Cytometry A* **Vol** (9), 1028 (2006).
- 35 Zerbino D.R. and Birney, E. , Velvet: algorithms for *de novo* short read assembly using de Bruijn graphs." *Genome Res* **18**(5): 821-9. (2008).
- 36 Rabiner L.R. A tutorial on hidden Markov models and selected applications in speech recognition. *Proceedings of the IEEE*, **77**(2): 257-286. (1989).

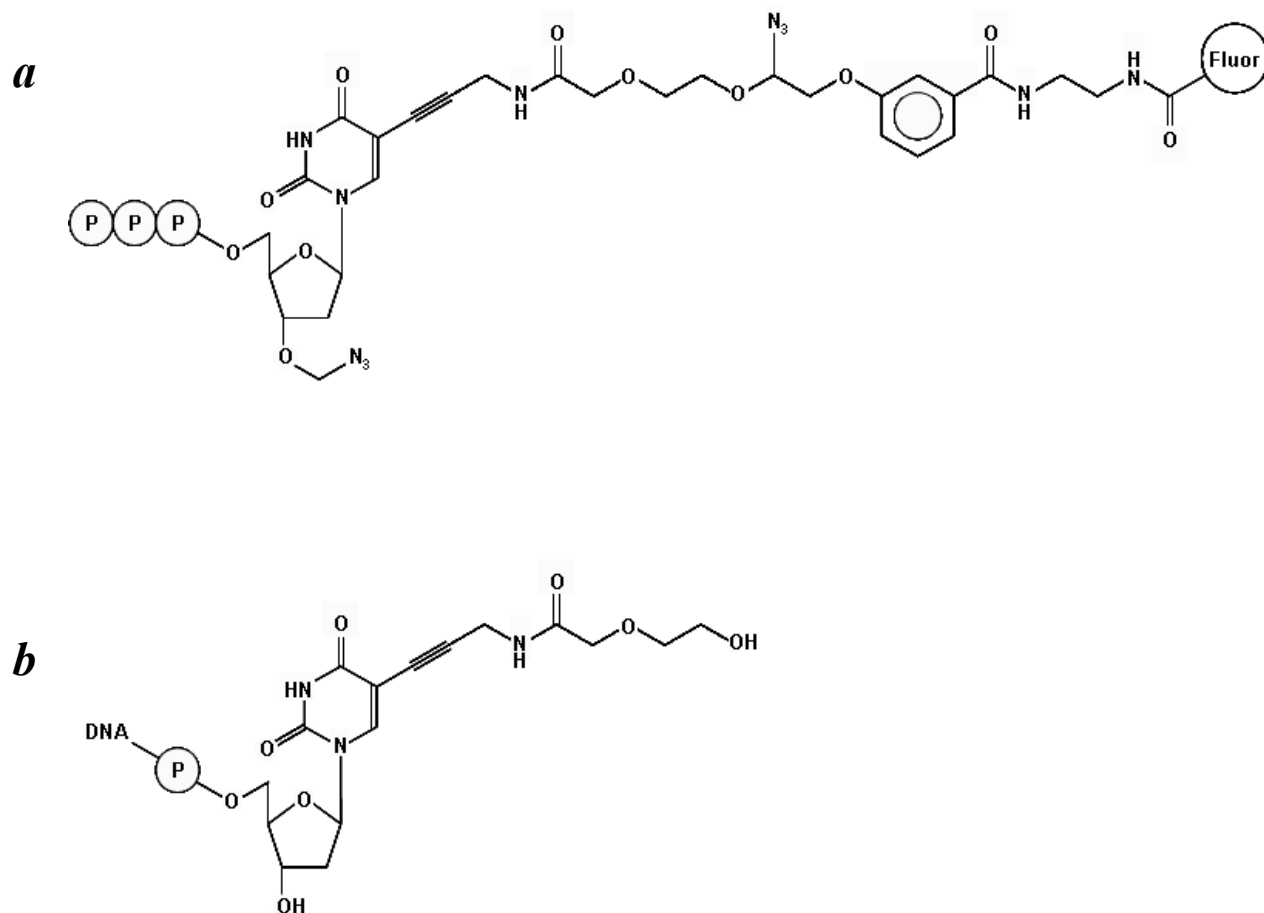

**Figure S1.** *a*. Structure of the reversible terminator 3'-*O*-azidomethyl 2'-deoxythymine triphosphate (T) labelled with a removable fluorophore. *b*. Structure of the incorporated nucleotide after removal of the fluorophore and terminator group. Each of the four nucleotides have an equivalent structure to the one shown here, except for the different base and a corresponding base-specific fluor.

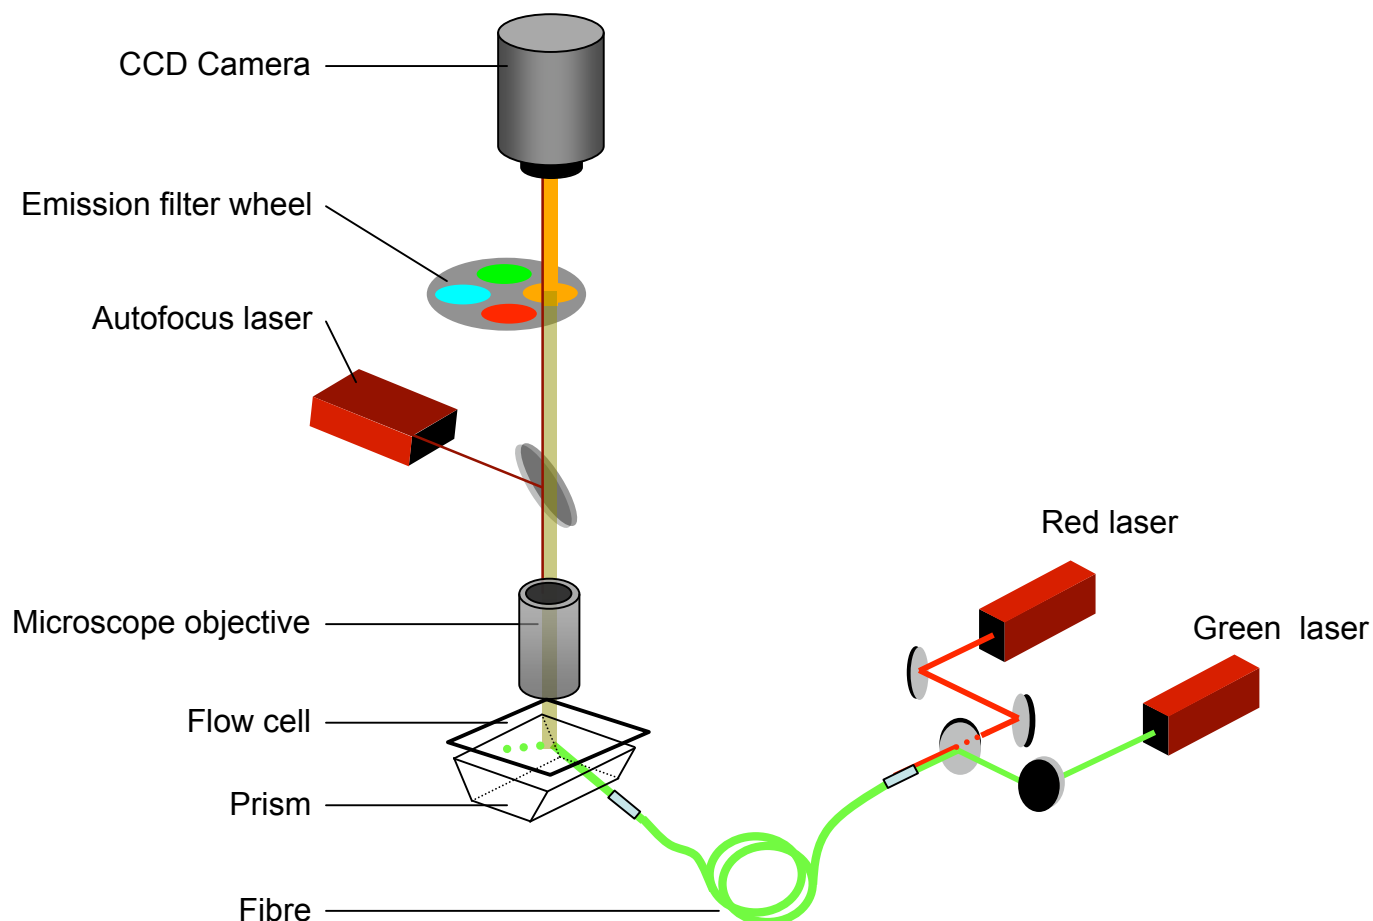

**Figure S2a.** Optical path of the Genome Analyser (GA1). Red (660 nm) and green (532 nm) lasers provide excitation beams that are directed along an optical fibre and through a prism which is in contact with the flow cell. Excitation of fluorescent nucleotides incorporated into DNA clusters on the inner surface of the flow cell (see fig S2b) leads to a base-specific emission that passes through an objective and a filter wheel and the signal is collected by a CCD camera. Autofocus utilises a third laser (635 nm) that is projected through the objective onto the flowcell (see fig S2c for details). Images are collected sequentially for each square 0.33 mm x 0.33 mm ‘tile’ on the flowcell surface (see fig S2d).

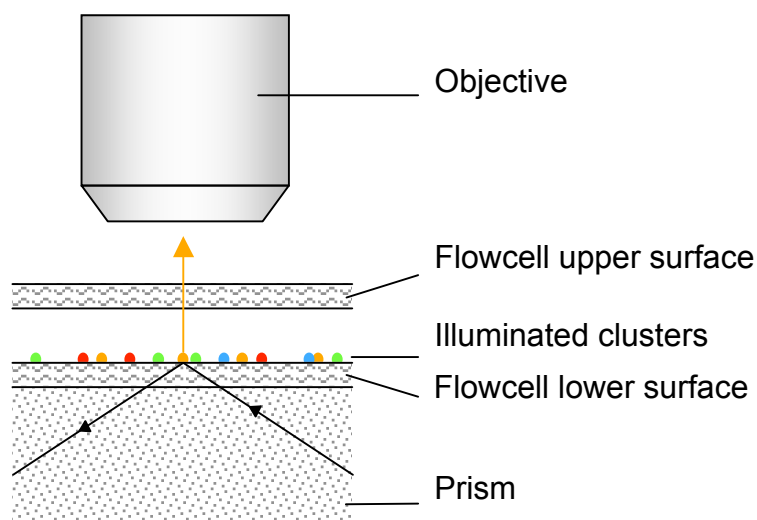

**Figure S2b.** Total internal reflection of the incident excitation beam at the glass-buffer interface generates an evanescent wave that excites the clusters on the surface. The fluorescence emission is captured by a custom made microscope objective, passed through a filter and is then projected onto a CCD. The evanescent wave excitation technique maximises the sensitivity of signal detection while minimising background noise.



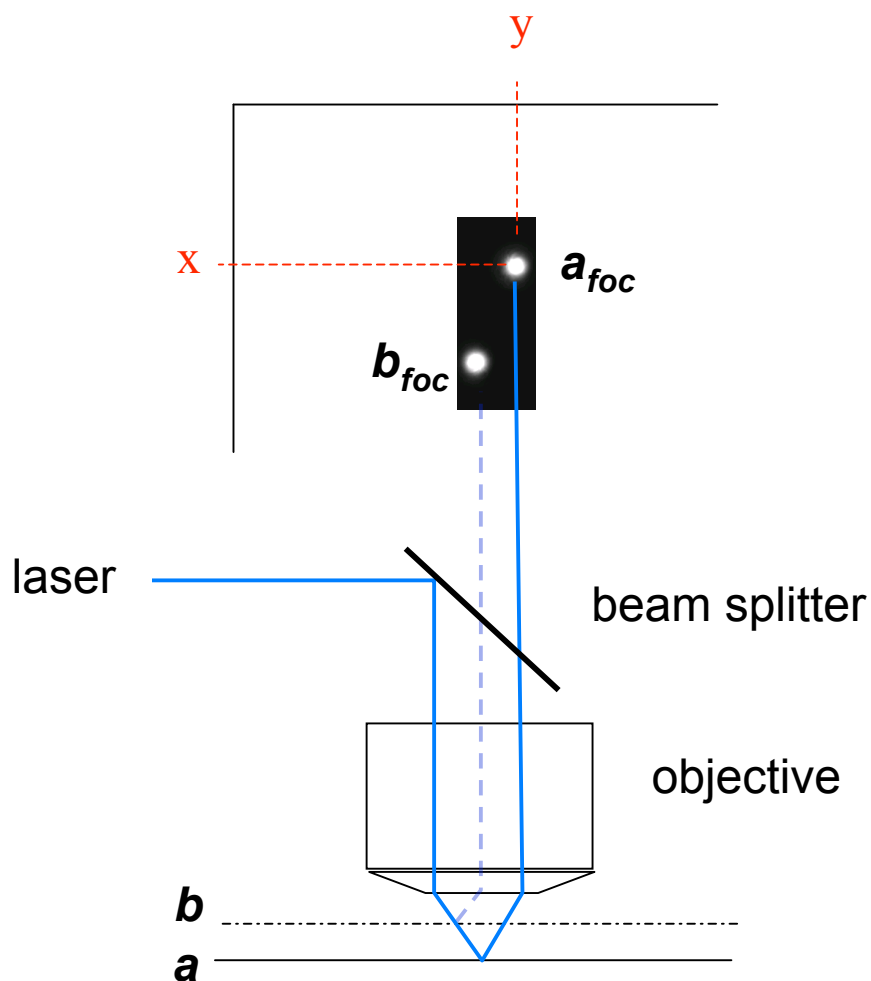

**Figure S2c.** Autofocus principle of operation. A reference laser beam (solid blue line) is deflected by a beam splitter along a path parallel to the optic axis of the microscope objective and is reflected from the surface of interest. Reflection from a focus plane  $a$  generates an autofocus spot  $a_{foc}$ . Focus is checked manually at the beginning of the run, after which the autofocus set-up registers the correct  $(x,y)$  co-ordinates for the autofocus spot relative to the boundaries of the tile. If the surface of interest is out of focus in a subsequent cycle (as in  $b$ ), the laser beam follows a different path (blue dashed line) and the autofocus spot is displaced at  $b_{foc}$ . Focus is automatically adjusted ( $z$  movement) as required to return the autofocus spot to the pre-registered correct position before image capture.

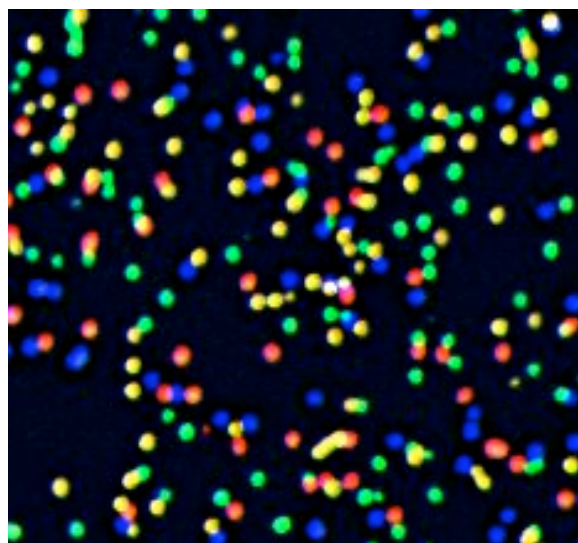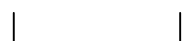

20 microns

**Figure S2d.** Imaging clusters during the sequencing process. Part of the image of a tile with a low density of clusters is shown. Four images, one for each emission wavelength, have been artificially coloured and superimposed to show the four-colour detection system that provides the raw signal intensity for calling the individual bases.

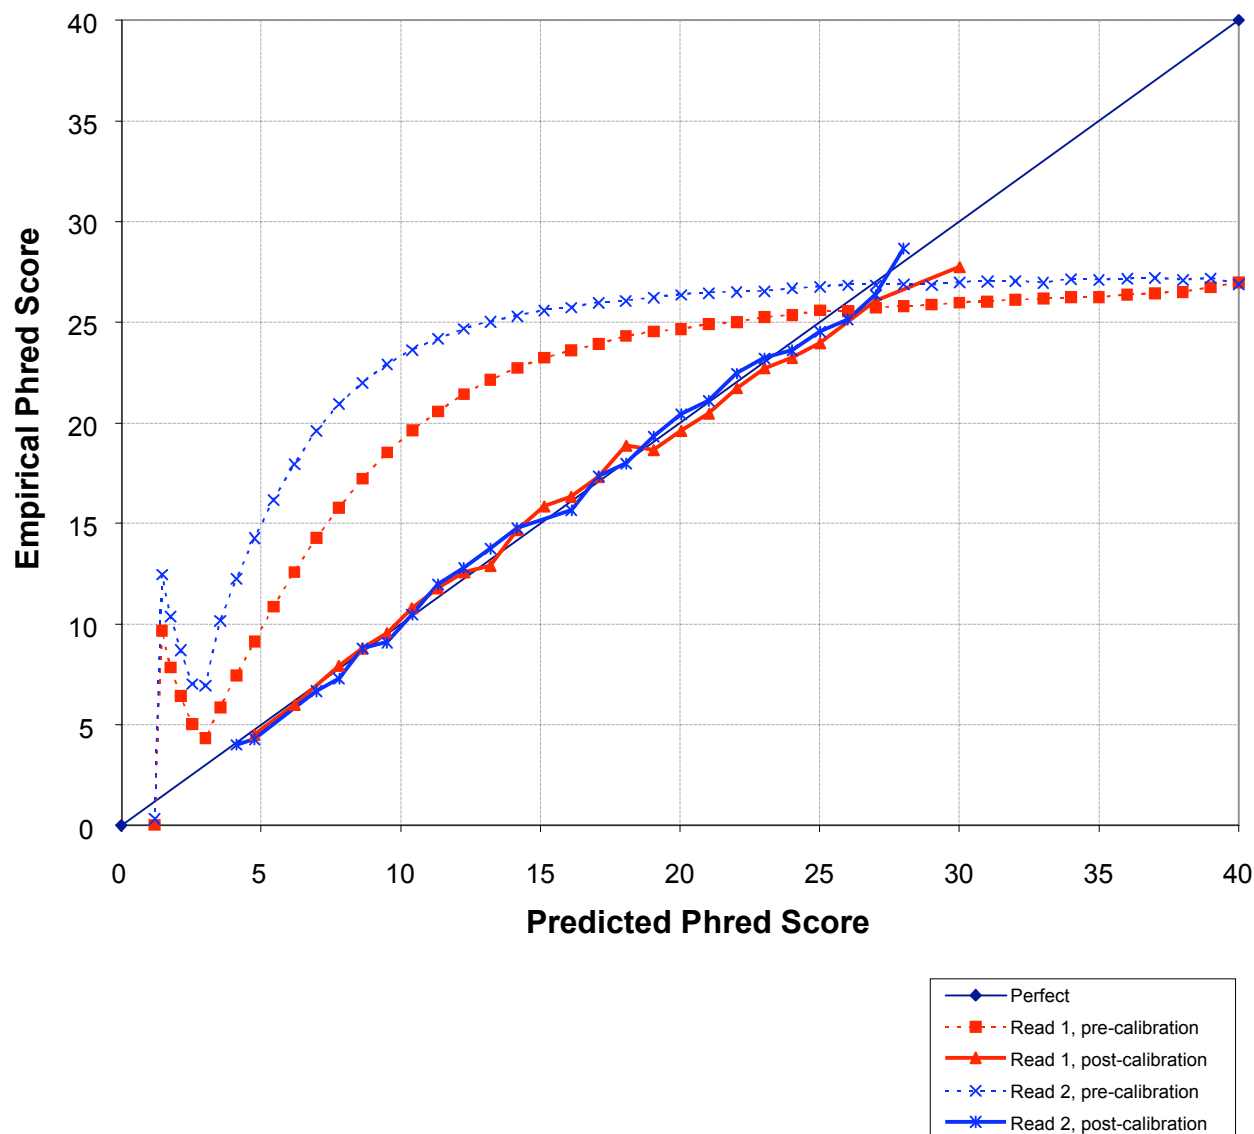

**Figure S3.** Effect of auto-calibration procedure on base quality scores (see supplementary methods for details). The data set is one lane of paired-read data from the NA18507 individual comprising 8,960,643 purity-filtered clusters, two 35-base reads being obtained from each cluster. Dotted lines show the original quality estimates obtained from the base caller for each read, the solid lines show the adjusted quality scores generated by the auto-calibration procedure. The probability estimates have been re-mapped from the log-odds scoring scheme in which they were originally expressed to the Phred scoring scheme of  $Q = -10 \log_{10}(\text{perror})$ , where  $\text{perror}$  is the probability of an incorrect base. No attempt was made to exclude genuine differences between the sample DNA and the human reference sequence from the calibration procedure, so the calibrated quality scores likely represent a lower bound on the true quality of the data set.

**a** 080531\_EAS192\_0038\_FC20GG5 – lane 5

| Read | Lane Info |                     | Tile Mean +/- SD for Lane |                | 1st Cycle Int (PF) | % intensity after 20 cycles (PF) | % PF clusters  | & Align (PF)   | Alignment Score (PF) | % Error Rate (PF) |
|------|-----------|---------------------|---------------------------|----------------|--------------------|----------------------------------|----------------|----------------|----------------------|-------------------|
|      | Lane      | Lane Yield (kbases) | Clusters (raw)            | Clusters (PF)  |                    |                                  |                |                |                      |                   |
| 1    | 5         | 297306              | 38689 +/- 3121            | 25740 +/- 1646 | 4211 +/- 867       | 87.22 +/- 11.11                  | 66.67 +/- 2.40 | 91.29 +/- 0.20 | 53.86 +/- 1.44       | 0.57 +/- 0.07     |
| 2    | 5         | 297306              | 38689 +/- 3121            | 25740 +/- 1646 | 2274 +/- 504       | 79.47 +/- 9.69                   | 66.67 +/- 2.40 | 89.80 +/- 0.40 | 49.65 +/- 1.78       | 0.69 +/- 0.09     |

Cumulative errors per read by cycle for read 1

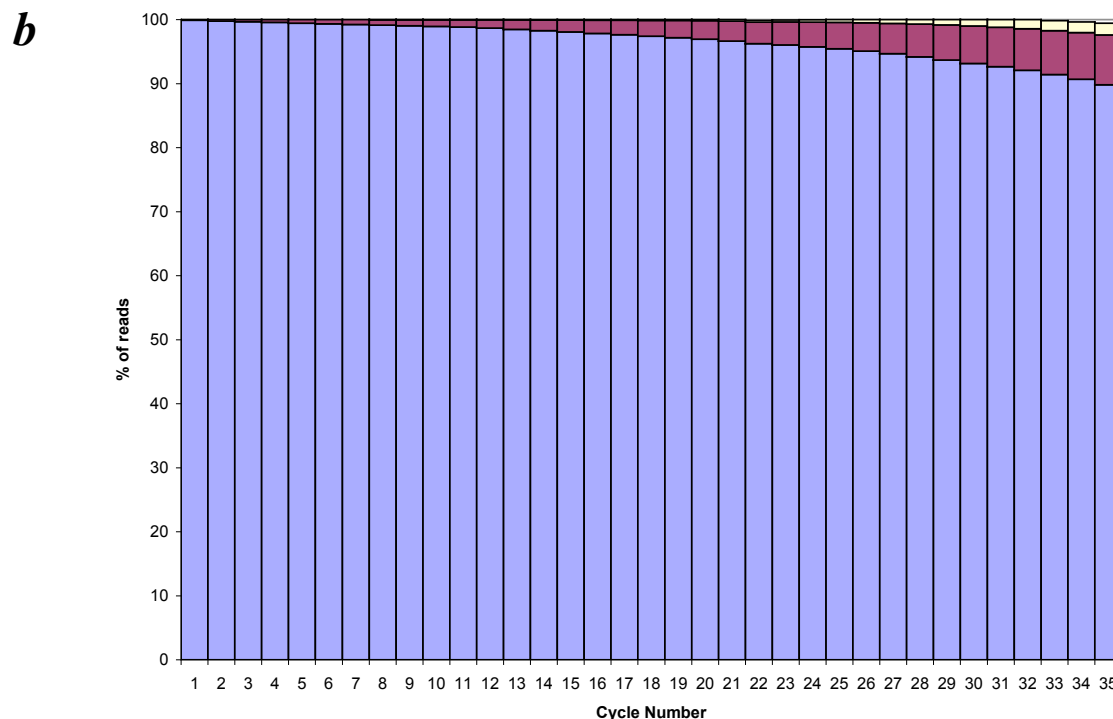

**Figure S4.** Sequencing summary data for the human BAC from one lane of a flow cell. **a**, summary table for lane 5 (reads 1 and 2). Lane yield = all PF clusters per lane x read length (0.035 kbases). First cycle intensity (Int) is averaged over all PF reads and given in arbitrary units. % intensity after 20 cycles provides a measure of signal loss during the run. The % PF clusters indicates the fraction of raw clusters that provide PF sequence data after purity filtering (described in supplementary methods). In this example 91.29% of reads (read 1) aligned to the BAC reference. Note that the BAC sample also contains *E. coli* DNA; we found that a further 7% of reads aligned to the *E. coli* reference. **b**. Plot of cumulative errors per read by cycle for read 1 of the experiment summarised in a. The plot shows the % reads with 0 (blue), 1 (burgundy) or 2 (yellow) differences from the reference.

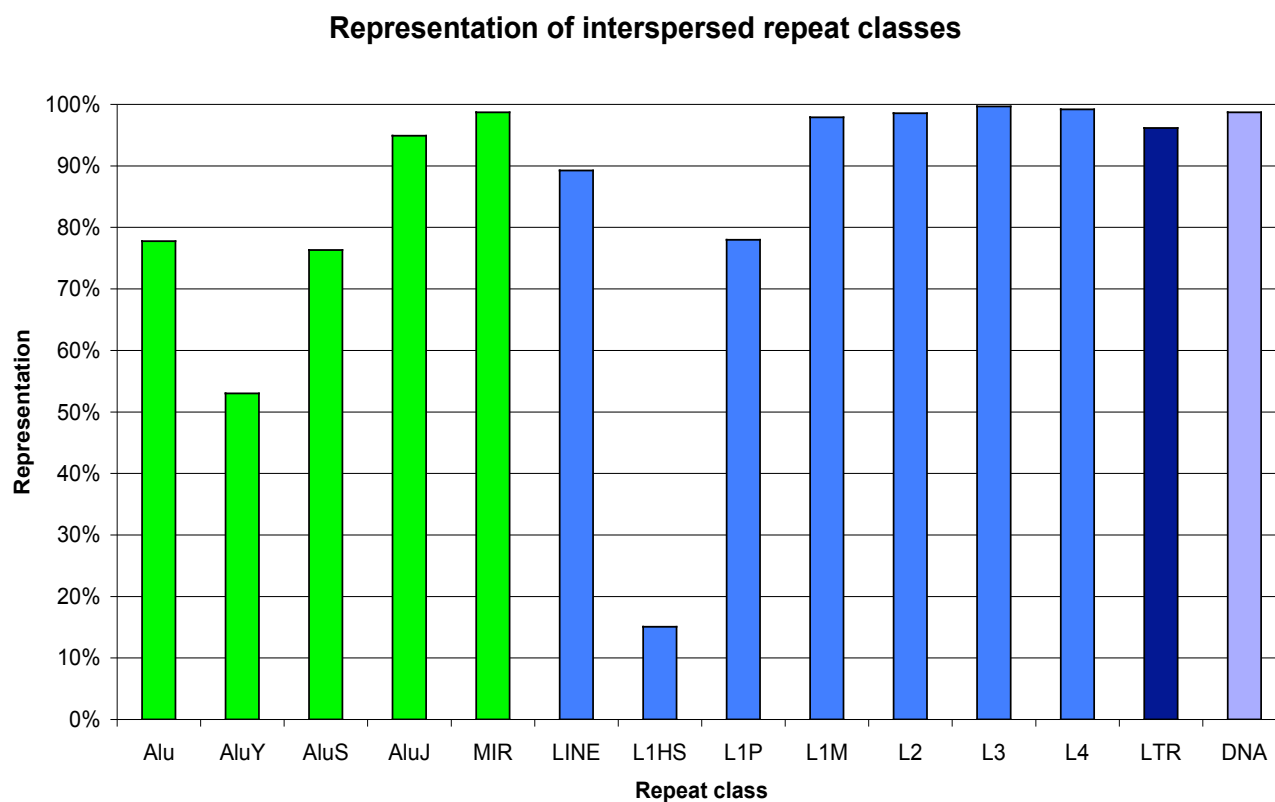

**Figure S5.** Representation of interspersed repeat classes in the ELAND alignment of the X chromosome dataset. Two-thirds of the low or zero sequence depth in the ELAND alignment is at interspersed repeats. The near-identical repeats arising from recently inserted retroposon elements L1Hs and members of the AluY subfamily of long and short interspersed nuclear element (SINE and LINE) classes are under-represented, while the rest are well covered with reads. Key: Alu, all Alu repeat sequences combined. Different subfamilies are as labelled: AluY - AluJ. LINE, all elements; subsets are defined by bars L1HS – L4. LTR, long terminal repeat retroposons. DNA, DNA transposons.

***a***

| Call         | ELAND     |               | MAQ       |               |
|--------------|-----------|---------------|-----------|---------------|
|              | SNPs<br>n | In dbSNP<br>% | SNPs<br>n | In dbSNP<br>% |
| Homozygote   | 36,402    | 91.7%         | 40,953    | 90.3%         |
| Heterozygote | 56,003    | 80.3%         | 63,614    | 77.6%         |
| All          | 92,485    | 84.9%         | 104,567   | 82.6%         |

***b***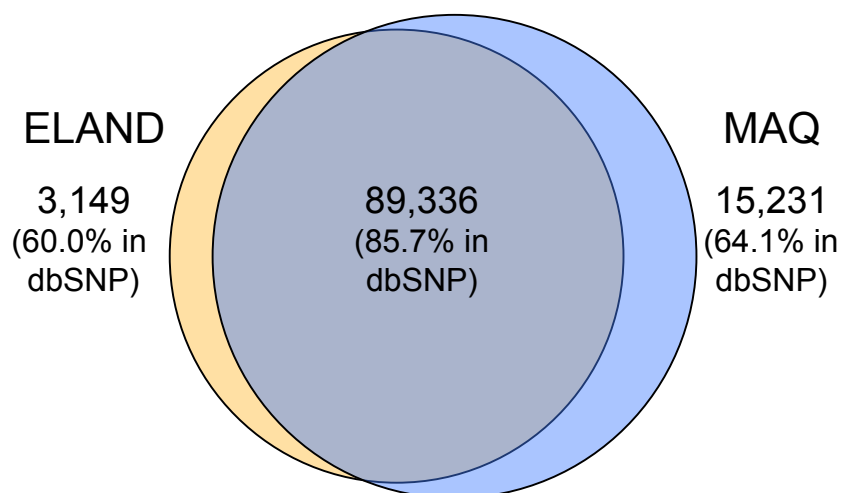

**Figure S6.** SNPs identified in the X chromosome sequence of NA07340. ***a***. Number of SNPs detected by class and % in dbSNP (release 128). Results from ELAND and MAQ alignments are reported separately. ***b***. Overlap of SNPs detected in each analysis. See figure S6c (next page) for a more detailed breakdown of SNPs called by MAQ but not ELAND.

**c**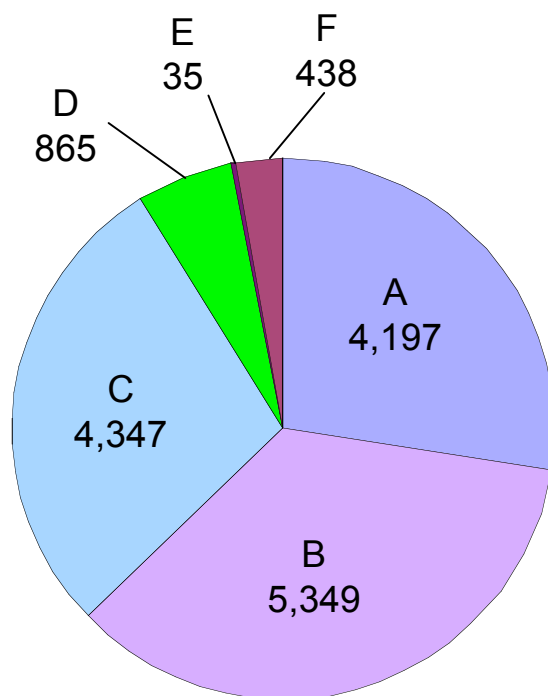

**Figure S6c.** Breakdown of NA07340 X-chromosome SNP calls present in MAQ but not the ELAND analysis. A: No call possible in ELAND analysis; B: MAQ calls a heterozygous position - both alleles are seen in the ELAND alignment but read depth is too low for one allele to reach the required score threshold; C: MAQ calls a heterozygous position - only the reference allele is seen in the ELAND alignment; D: Different SNP calls are made by ELAND and MAQ; E: MAQ calls a homozygous difference from the reference where ELAND calls a heterozygous position; F: MAQ calls a homozygous difference from the reference where ELAND calls the reference allele.

**a**

| Input read depth x-fold | GT posns not covered % (of 13604) | hets undercalled % (of 4717 hets) | Discordant calls % |
|-------------------------|-----------------------------------|-----------------------------------|--------------------|
| 9                       | 12.12                             | 4.92                              | 0                  |
| 11                      | 9.16                              | 3.43                              | 0                  |
| 15                      | 2.90                              | 1.27                              | 0                  |
| 22                      | 1.18                              | 0.38                              | 0                  |
| 30                      | 0.29                              | 0.17                              | 0                  |
| 45                      | 0.09                              | 0.02                              | 0                  |

**b**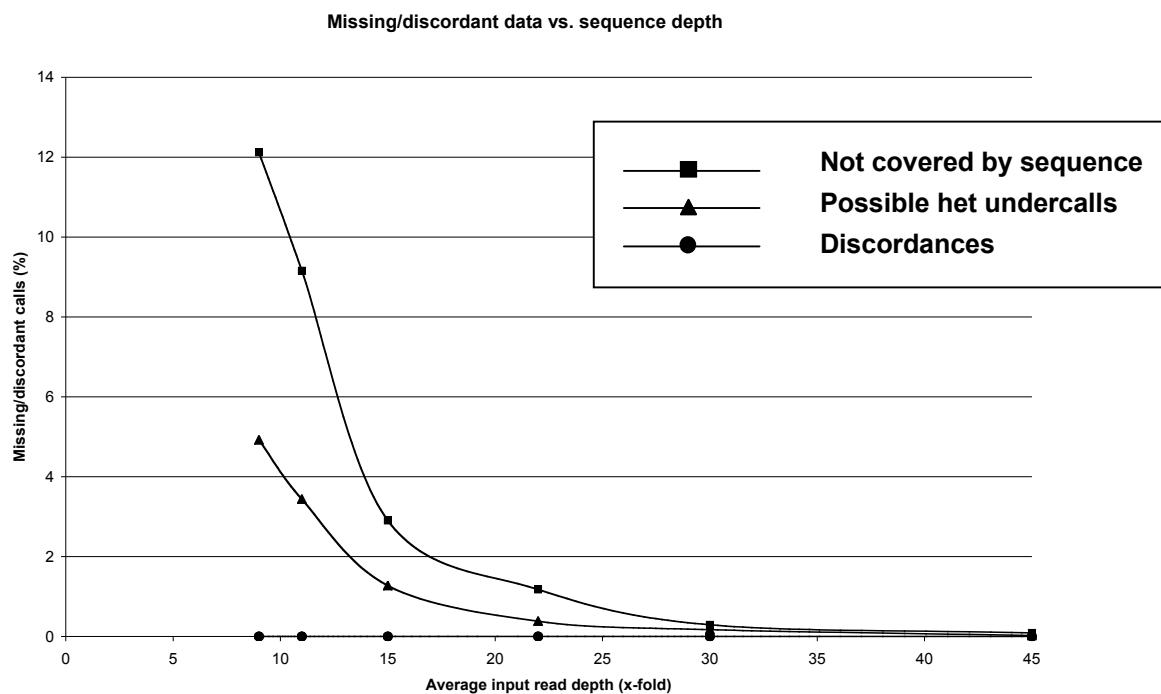

**Figure S7.** Analysis of SNP calls in X chromosome data for NA07340 using MAQ at different input read depths, compared to genotype data. **a.** Tabulated values and **b.** plot of percent coverage of 13604 genotype positions, percent of heterozygotes undercalled compared to genotype results, and discordant calls (all 0) as a function of Input read depth (from 9x to 45x).



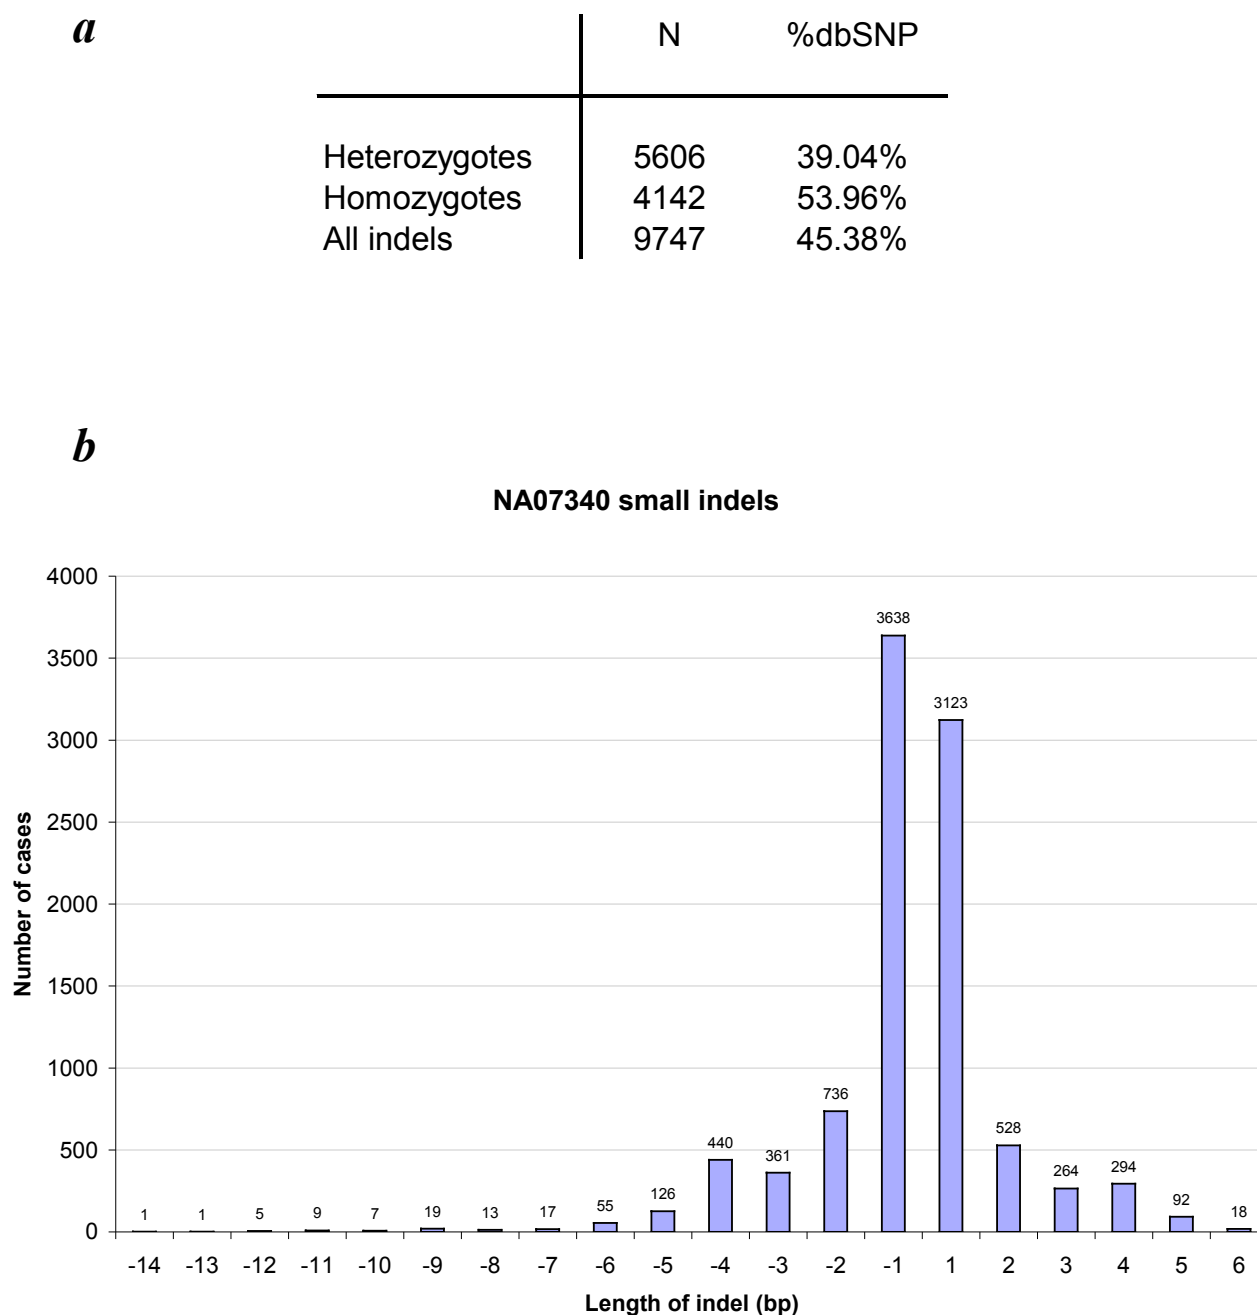

**Figure S8.** Analysis of short indel calls in X chromosome data for NA07340. **a.** total number of calls and fraction that match previous entries in dbSNP. **b.** Distribution of size in the 9747 indels. + and – values on the x axis correspond to presence or absence of bases in NA07340 relative to the reference sequence.

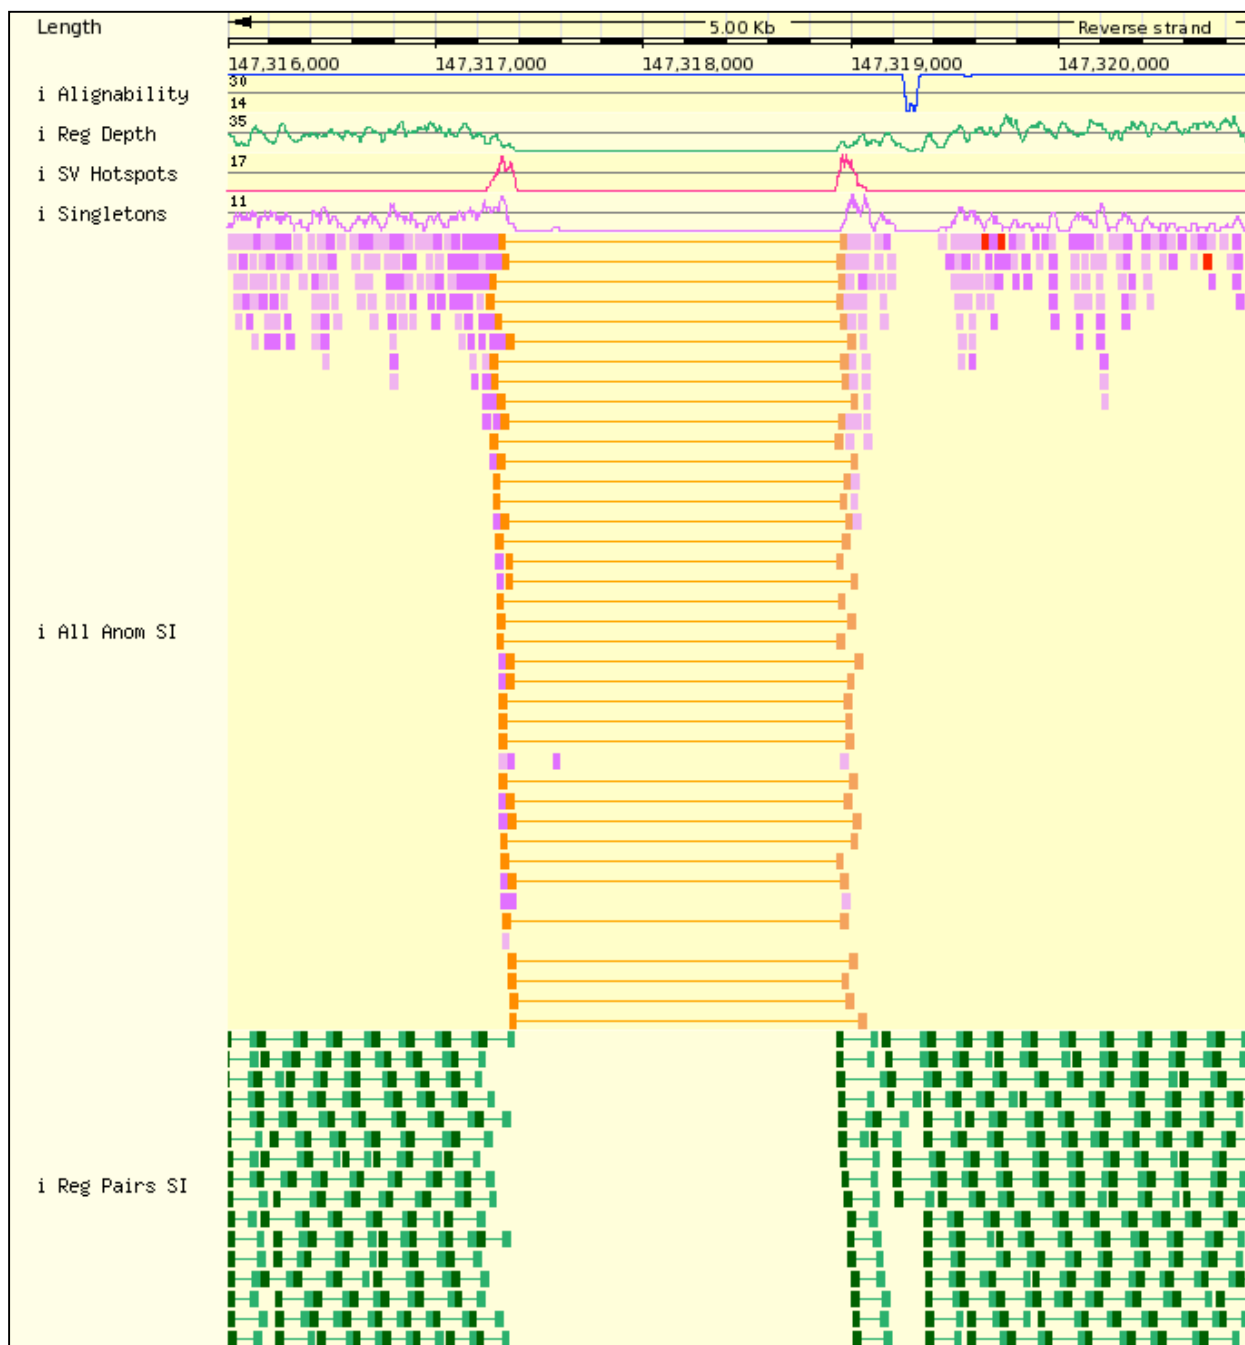

**Figure S9a.** homozygous 1.6 kb deletion in NA07340 relative to the reference, detected by anomalously spaced read pairs (orange) compared to regularly spaced read pairs (green). Purple reads are singletons, i.e. reads where the other member of the pair does not align to the reference. Note also the alignability score (blue line) is high across the region. Read depth (green line) falls to zero within the deletion. The red line depicts SV hotspots, and provides a quick look-up for regions where there is a concentration of anomalous events detected on the basis of the paired read alignments. Note that this display is a composite of screen shots of the same window, overlapped for display purposes in this figure.

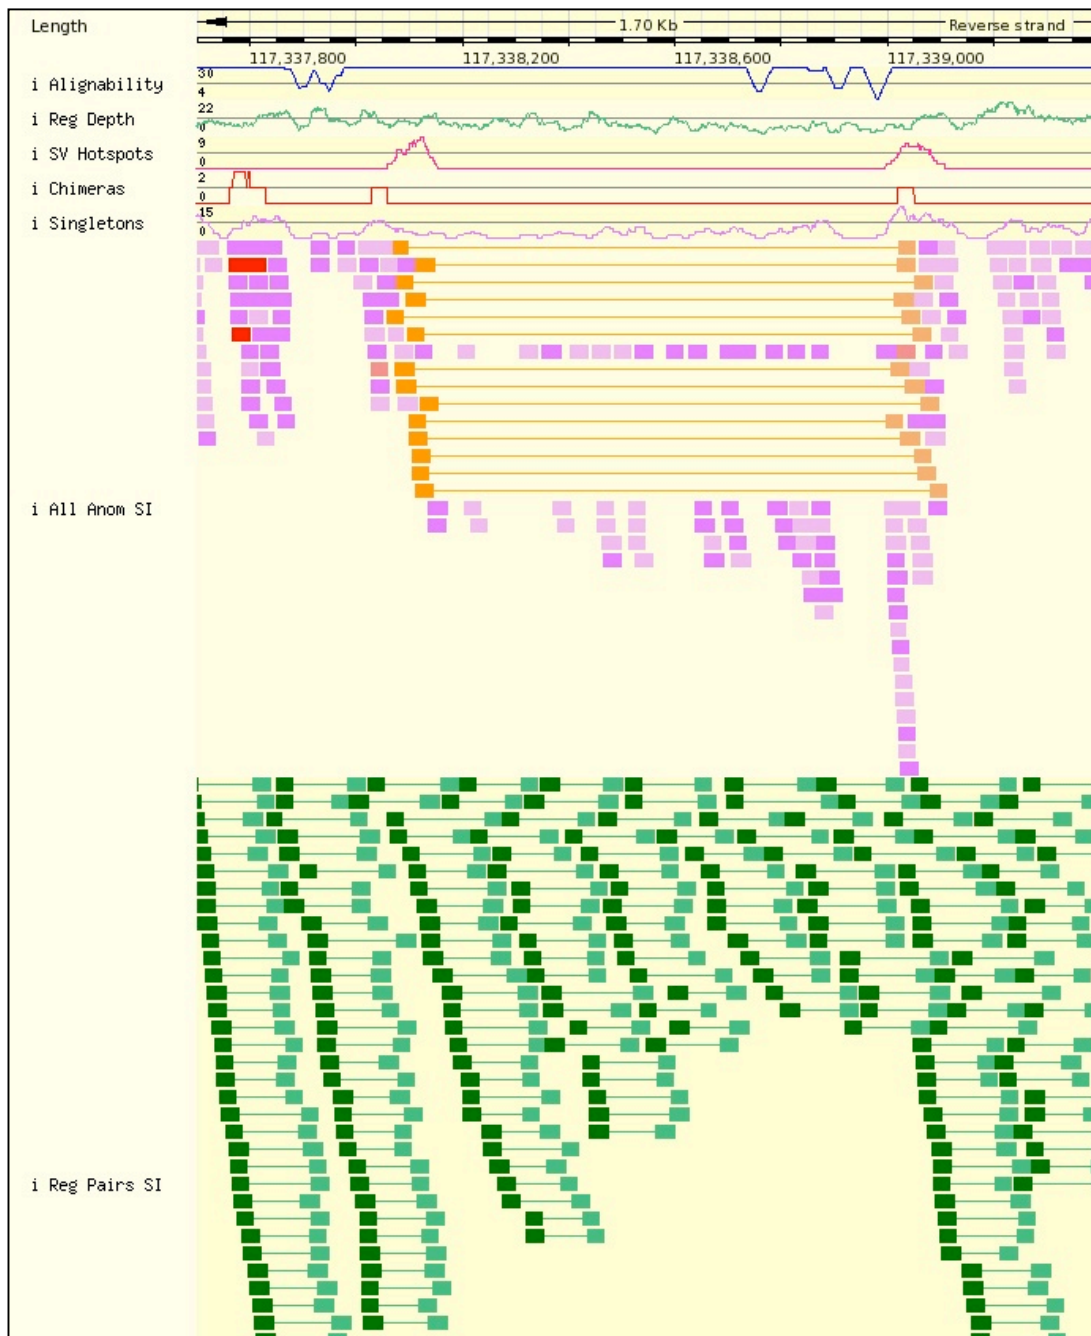

**Figure S9b.** Heterozygous 844 bp deletion in NA07340 relative to the reference, detected by anomalously spaced read pairs (orange) compared to regularly spaced read pairs (green). The presence of regularly spaced pairs across the entire region is indicative of heterozygosity at this locus. Note that this display is a composite of screen shots of the same window, overlapped for display purposes in this figure.

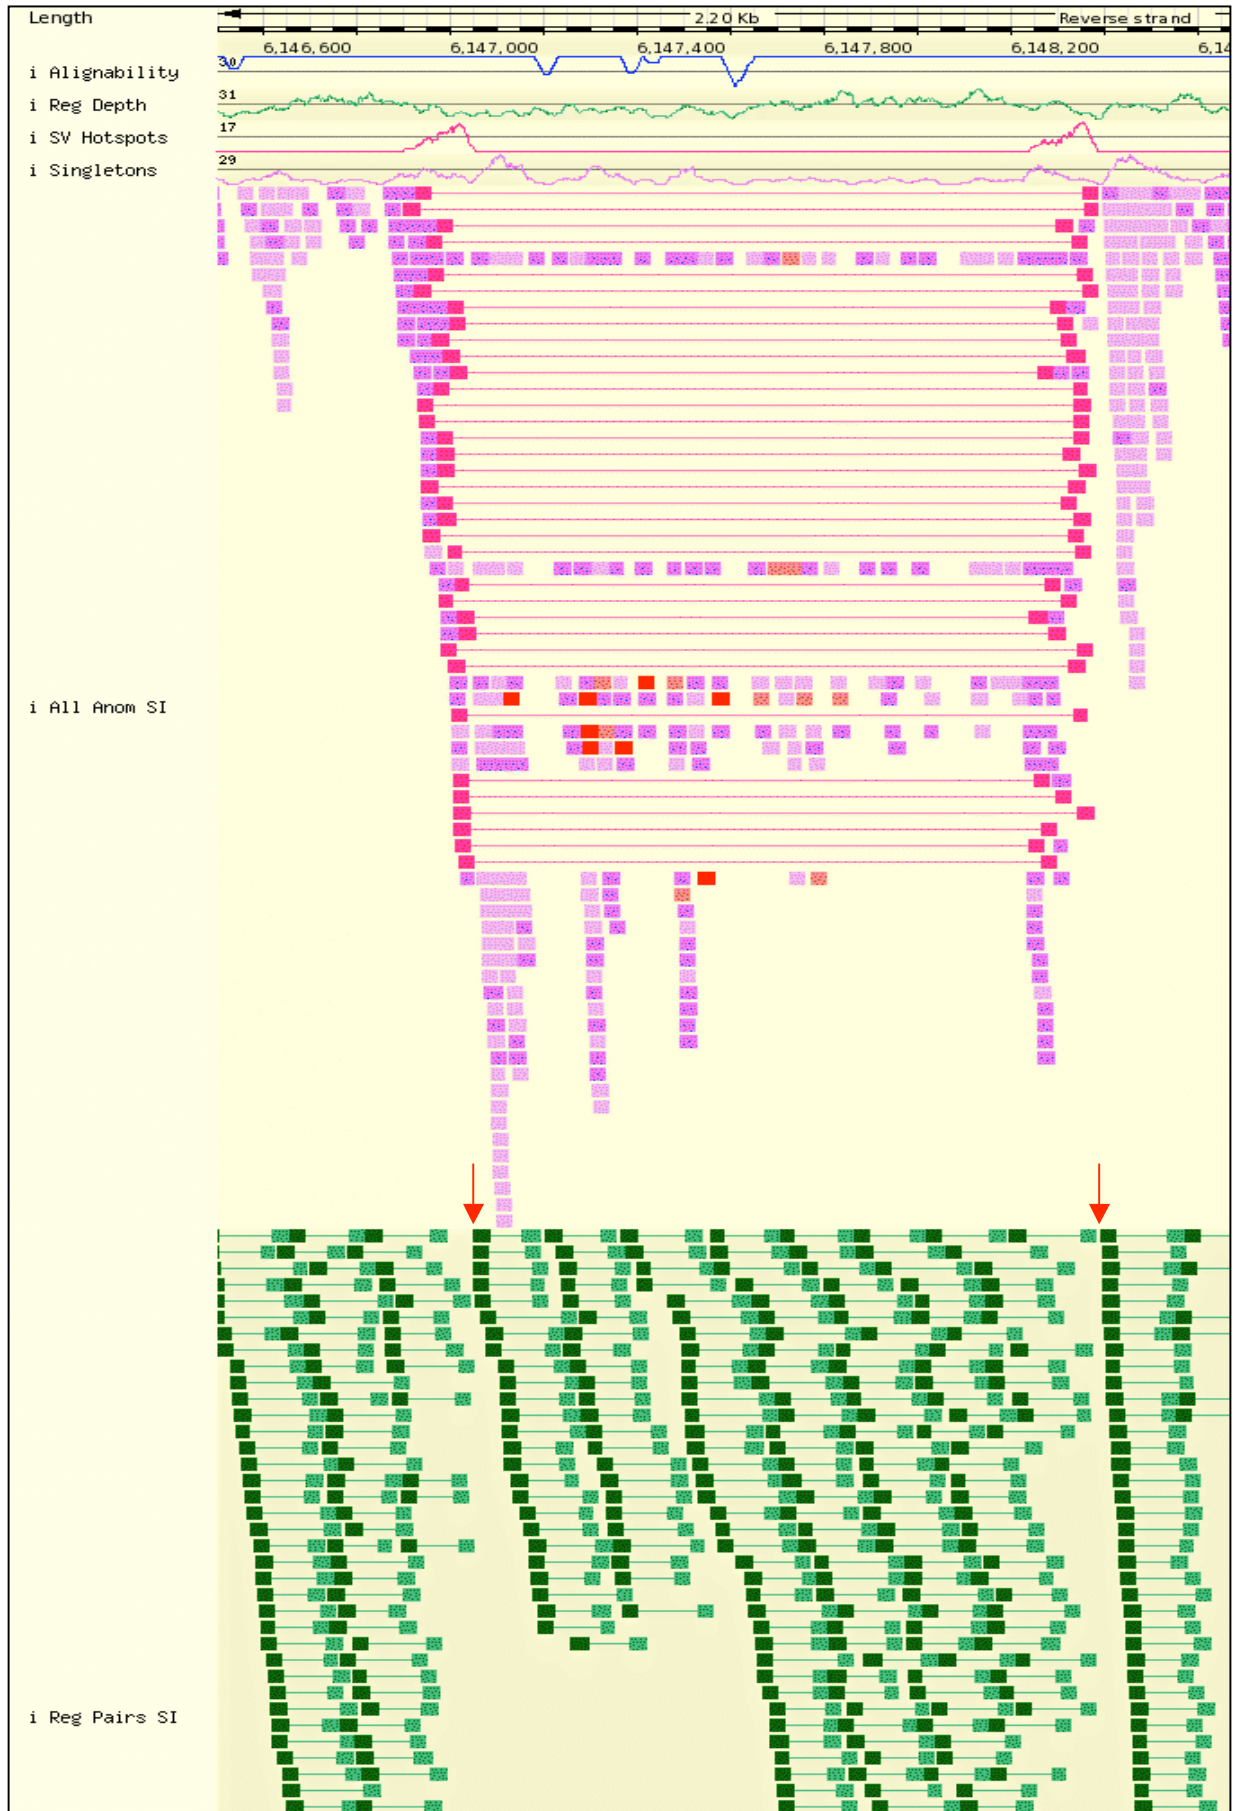

Figure S10. (See next page for legend).

**Figure S10 (see previous page for figure).** Homozygous 1.5 kb inversion in NA07340 relative to the reference, detected by anomalously spaced and inverted read pairs (red) compared to regularly spaced read pairs (green). Note the gaps in continuity of coverage in the normal short inserts, indicated by the red arrows, indicating that this variant is homozygous. No read pair spans either breakpoint. The reader is asked to refer to the website (link below) and to zoom in to visualise the gap running through the complete dataset. Note also the alignability score (blue line) is high across most of the region. Read depth (green line) remains high across the inversion. Purple reads are singletons, which accumulate as the other member of the read pair does not match to the reference. Singletons at each inversion breakpoint result from the disruption in alignment of the other member of the pair at or near the breaks. Red arrows indicate homozygous breaks in continuity with normal paired end mapping. Note that this display is a composite of screen shots of the same window, overlapped for display purposes in this figure.

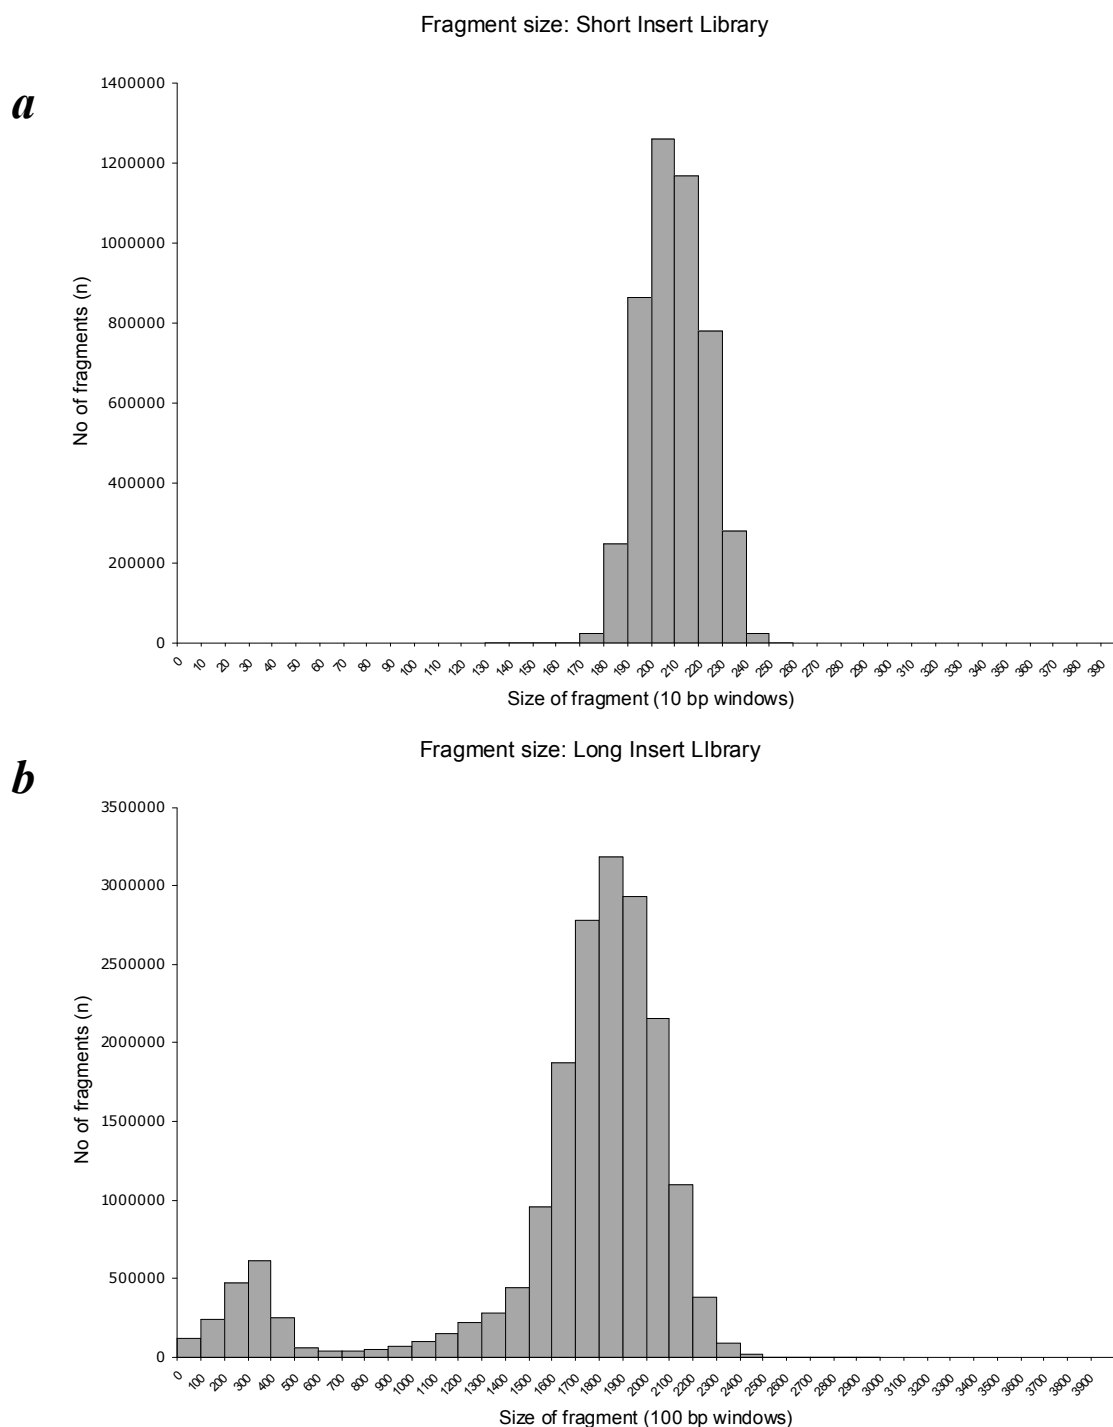

**Figure S11** Size distribution for DNA fragment libraries of NA18507. Fragment lengths were determined from the separation between read pairs aligned to the reference. **a.** Short insert library, data from one lane of a flowcell were analysed and fragment lengths binned in 10 bp windows. **b.** Long insert library, data from six lanes of a flowcell with lengths binned in 100 bp windows. Note that the smaller peak on the left reflects the presence of a small fraction of short, non-junction fragments of genomic DNA that are not biotinylated. These are readily eliminated during analysis as the orientation of the paired reads is opposite to that of the real junction fragments (see fig 1 for more details).

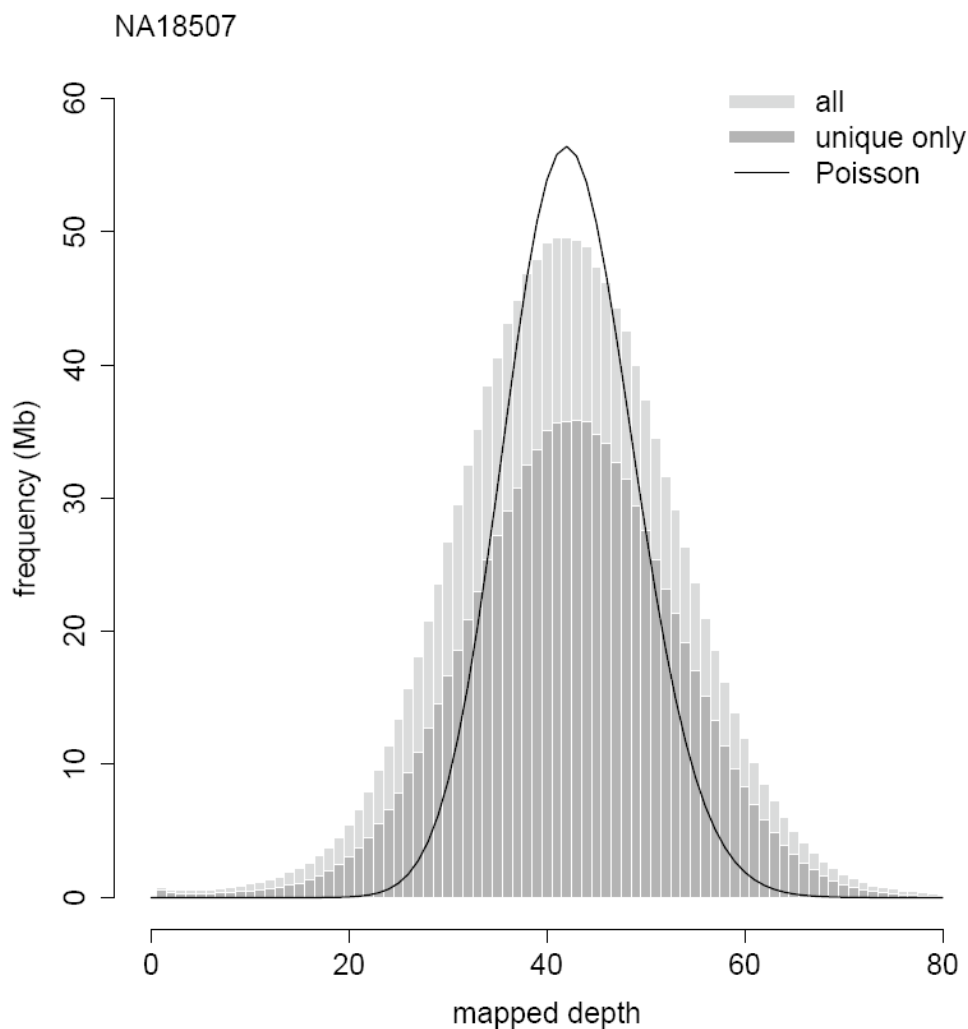

**Figure S12a.** Distribution of mapped read depth in the human genome dataset, sampled at every 500<sup>th</sup> position along the genome and displayed as a histogram ('all'). An equivalent analysis of mapped read depth for the unique subset of these positions is also shown ('unique only'). The solid line represents a Poisson distribution for unique human genome sequence



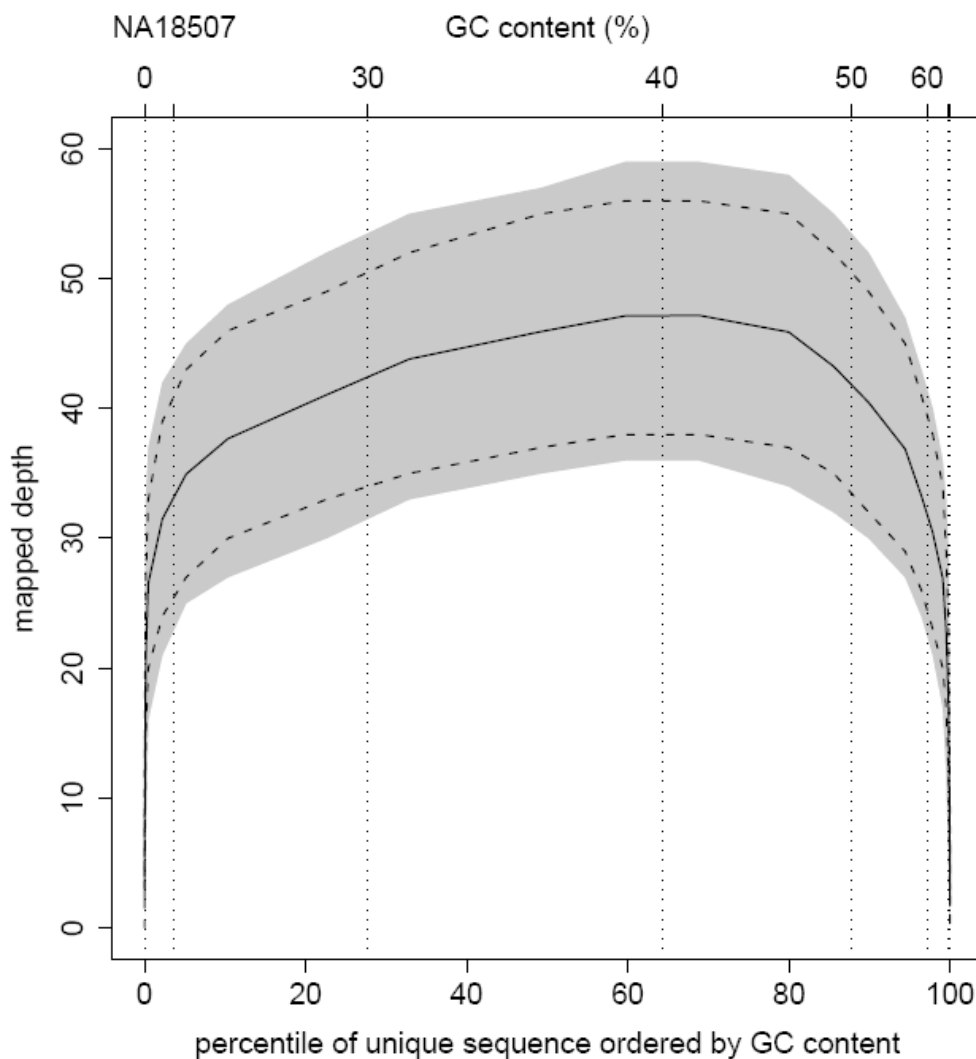

**Figure S12b.** Distribution of human genome NA18507 uniquely mapped reads as a function of GC content. Note that the x axis is % GC content and is scaled by percentile of unique sequence. The solid line is average mapped depth of unique sequence; the grey region is the central 80% of the data (10th to 90th centiles); the dashed lines are 10th and 90th centiles of a Poisson distribution with the same mean as the data. GC biases may be introduced during sample pre-amplification, cluster growth and/or sequencing. Possible contributors include reduced efficiency of GC-rich fragment amplification or loss of very short AT-rich fragments due to denaturation during sample preparation, both of which might vary from library to library and result in the difference in distribution seen here compared to the X-chromosome library (see fig. 2b).



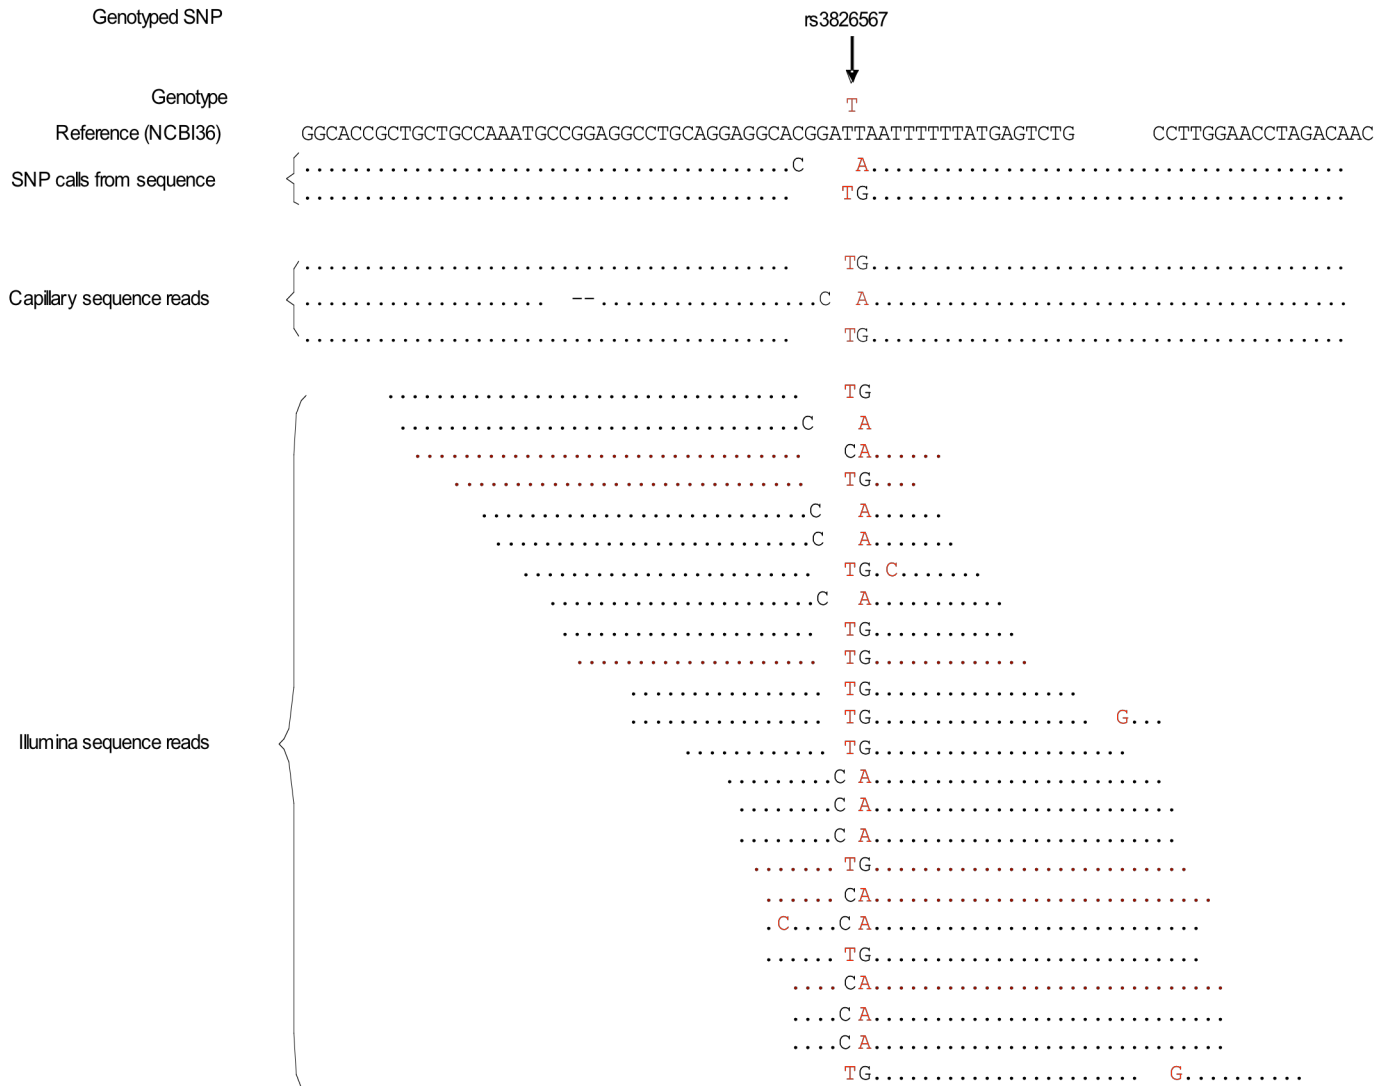

**Figure S13.** Sequence data reveals ‘hidden’ SNPs that cause genotyping errors. *a.* Example of a ‘hidden’ SNP detected in the sequence data. The HM550 genotyping records a ‘T’ only for NA18507 at SNP rs3826567 (arrowed), indicating that this individual is homozygous ‘TT’ at this position. Illumina sequence reads detect two alleles at this position, T and C, indicating a heterozygous position ‘TC’. Capillary sequence reads obtained previously for this individual were available in the trace archive and confirm the existence of both T and C alleles. The sequence data identify the existence of a second SNP (the ‘hidden SNP’) directly adjacent to rs3826567 and indicate that NA18507 is heterozygous ‘AG’ at this position. As the genotyping assay utilises the reference sequence (in this case ‘G’) for design of the oligonucleotides used in the assay, the genotyping assay does not accommodate the existence of the non-reference ‘A’ allele and only interacts with DNA containing the reference ‘G’ allele, resulting in a ‘T’ call at rs3826567.

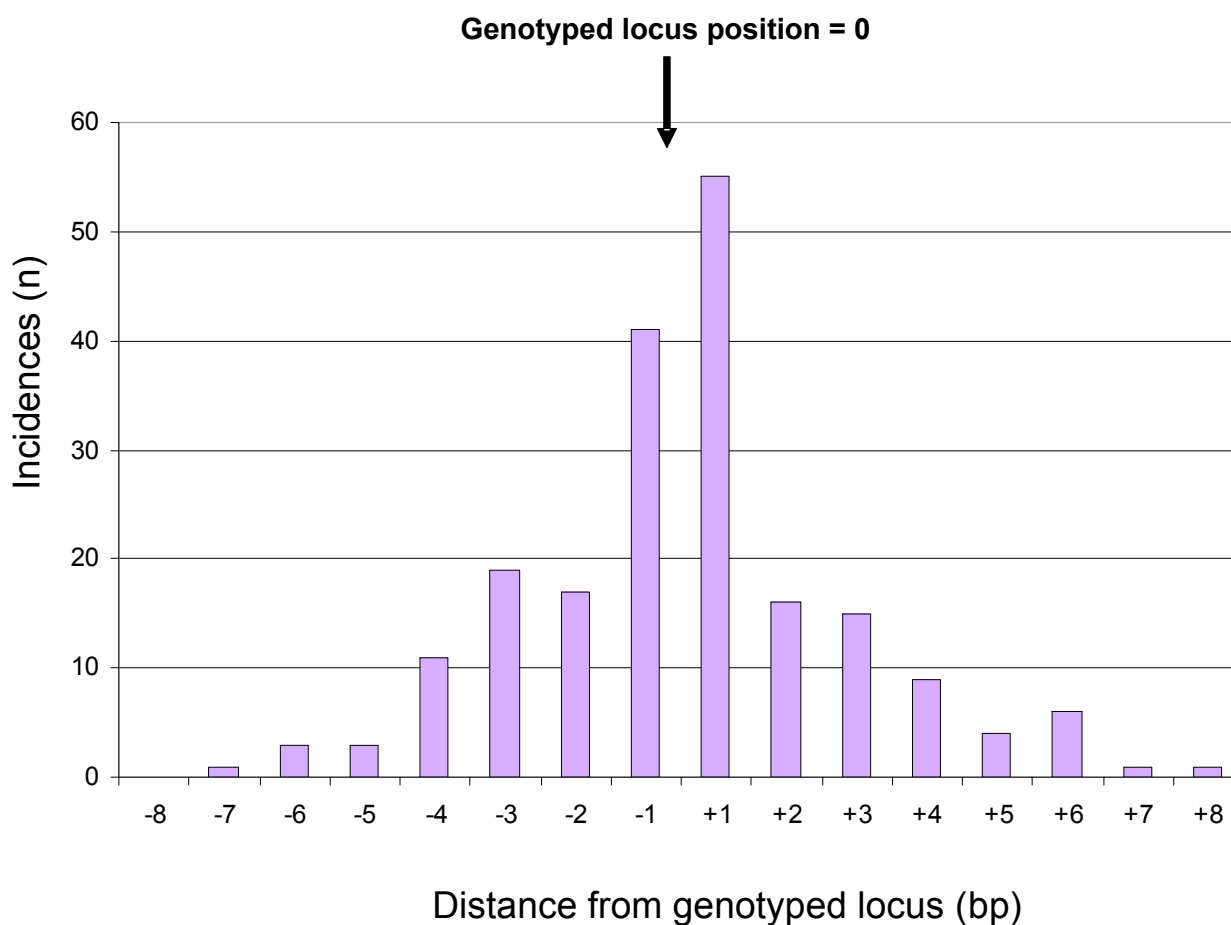

**Figure S14.** Distribution of ‘hidden’ SNPs in 202 discordant calls (see main text for description of ‘hidden’ SNPs). Note that ‘hidden’ SNPs will affect any genotyping platform. We therefore expect a low, but non-zero, level of genotype undercalling (Seq>GT) that is highly correlated between the platforms that use these flanking sequences in assay design.

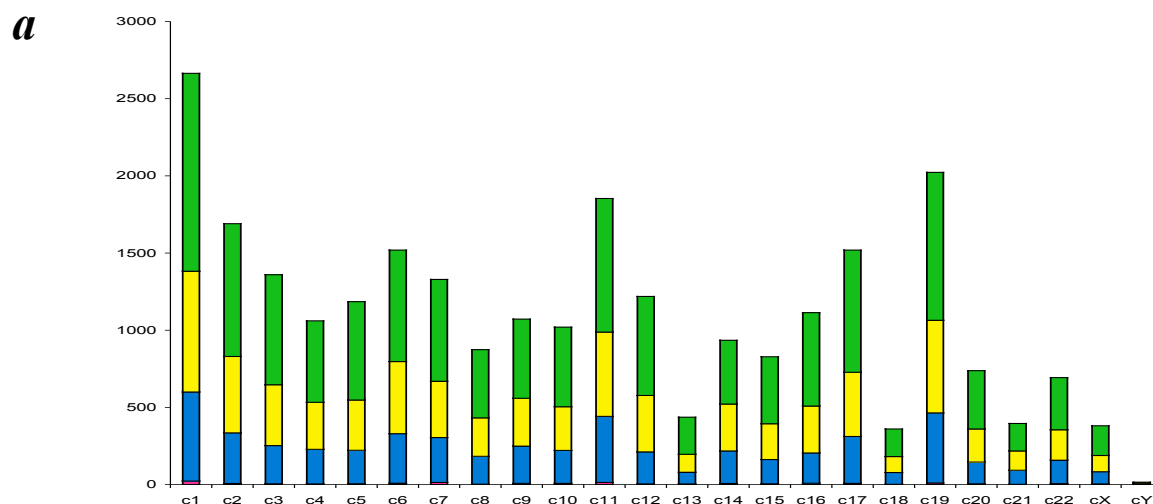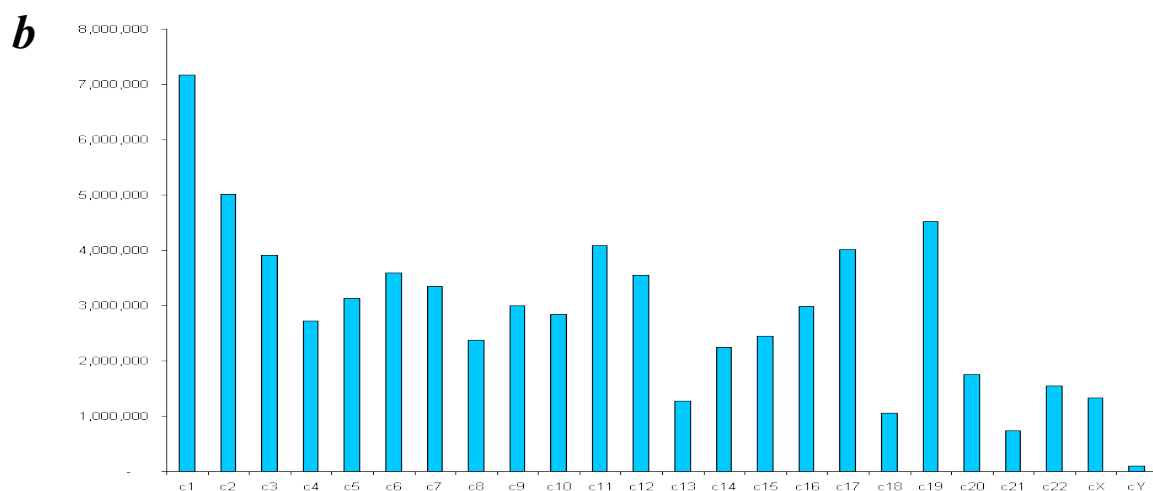

**c**

| Chromosome                                                            | 1    | 2    | 3    | 4    | 5    | 6    | 7    | 8    | 9    | 10   | 11         | 12         |
|-----------------------------------------------------------------------|------|------|------|------|------|------|------|------|------|------|------------|------------|
| Heterozygosity (no. of hets/covered coding bases x 10 <sup>-3</sup> ) | 0.54 | 0.46 | 0.46 | 0.54 | 0.48 | 0.57 | 0.57 | 0.55 | 0.51 | 0.51 | 0.66       | 0.45       |
| Chromosome                                                            | 13   | 14   | 15   | 16   | 17   | 18   | 19   | 20   | 21   | 22   | All coding | All genome |
| Heterozygosity (no. of hets/covered coding bases x 10 <sup>-3</sup> ) | 0.49 | 0.58 | 0.45 | 0.57 | 0.53 | 0.42 | 0.63 | 0.62 | 0.65 | 0.61 | 0.54       | 0.99       |

**Figure S15.** Coding SNPs in NA18507, based on the gene annotation in Ensembl (release 49). **a.** distribution of coding SNPs and their consequences by chromosome. Green: synonymous, yellow: non-synonymous, conservative, blue: non-conservative, red: premature stop codons. **b.** distribution of coding bases by chromosome. Note close correlation of coding SNP and coding sequence distribution by chromosome (as opposed to overall chromosome length). **c.** Correlation of heterozygosity with coding length between chromosomes. Average autosomal coding region heterozygosity (‘All coding’) is approximately half that of genome average for autosomes (‘All genome’).

**a**

|               | n       | %dbSNP |
|---------------|---------|--------|
| All indels    | 404,416 | 49.82% |
| Heterozygotes | 260,620 | 41.44% |
| Homozygotes   | 143,796 | 64.99% |

**b**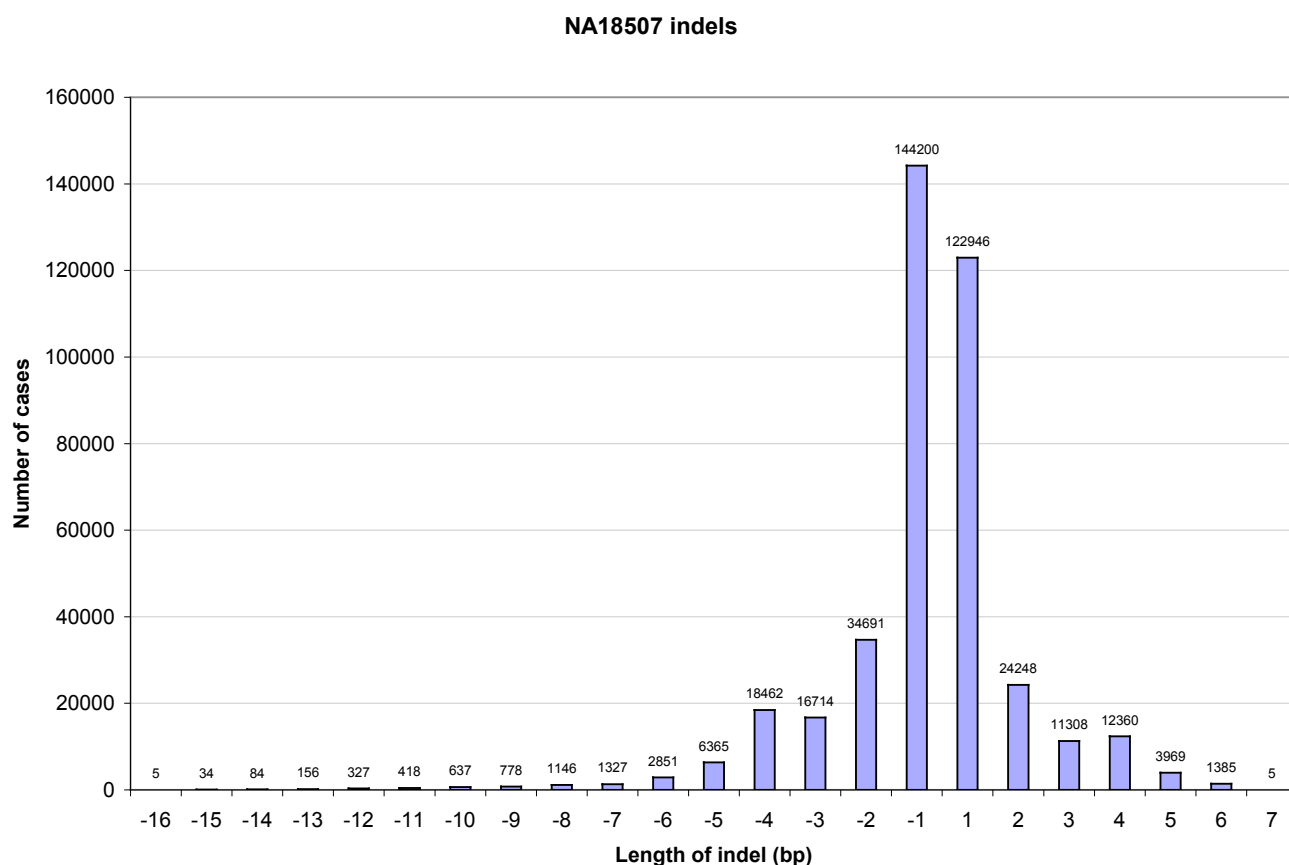

**Figure S16.** Analysis of short indel calls in human genome data for N18507. **a.** total number of calls and fraction that match previous entries in dbSNP. **b.** Distribution of size in the 404,416 indels. + and – values on the x axis correspond to presence or absence of bases in NA18507 relative to the reference sequence.

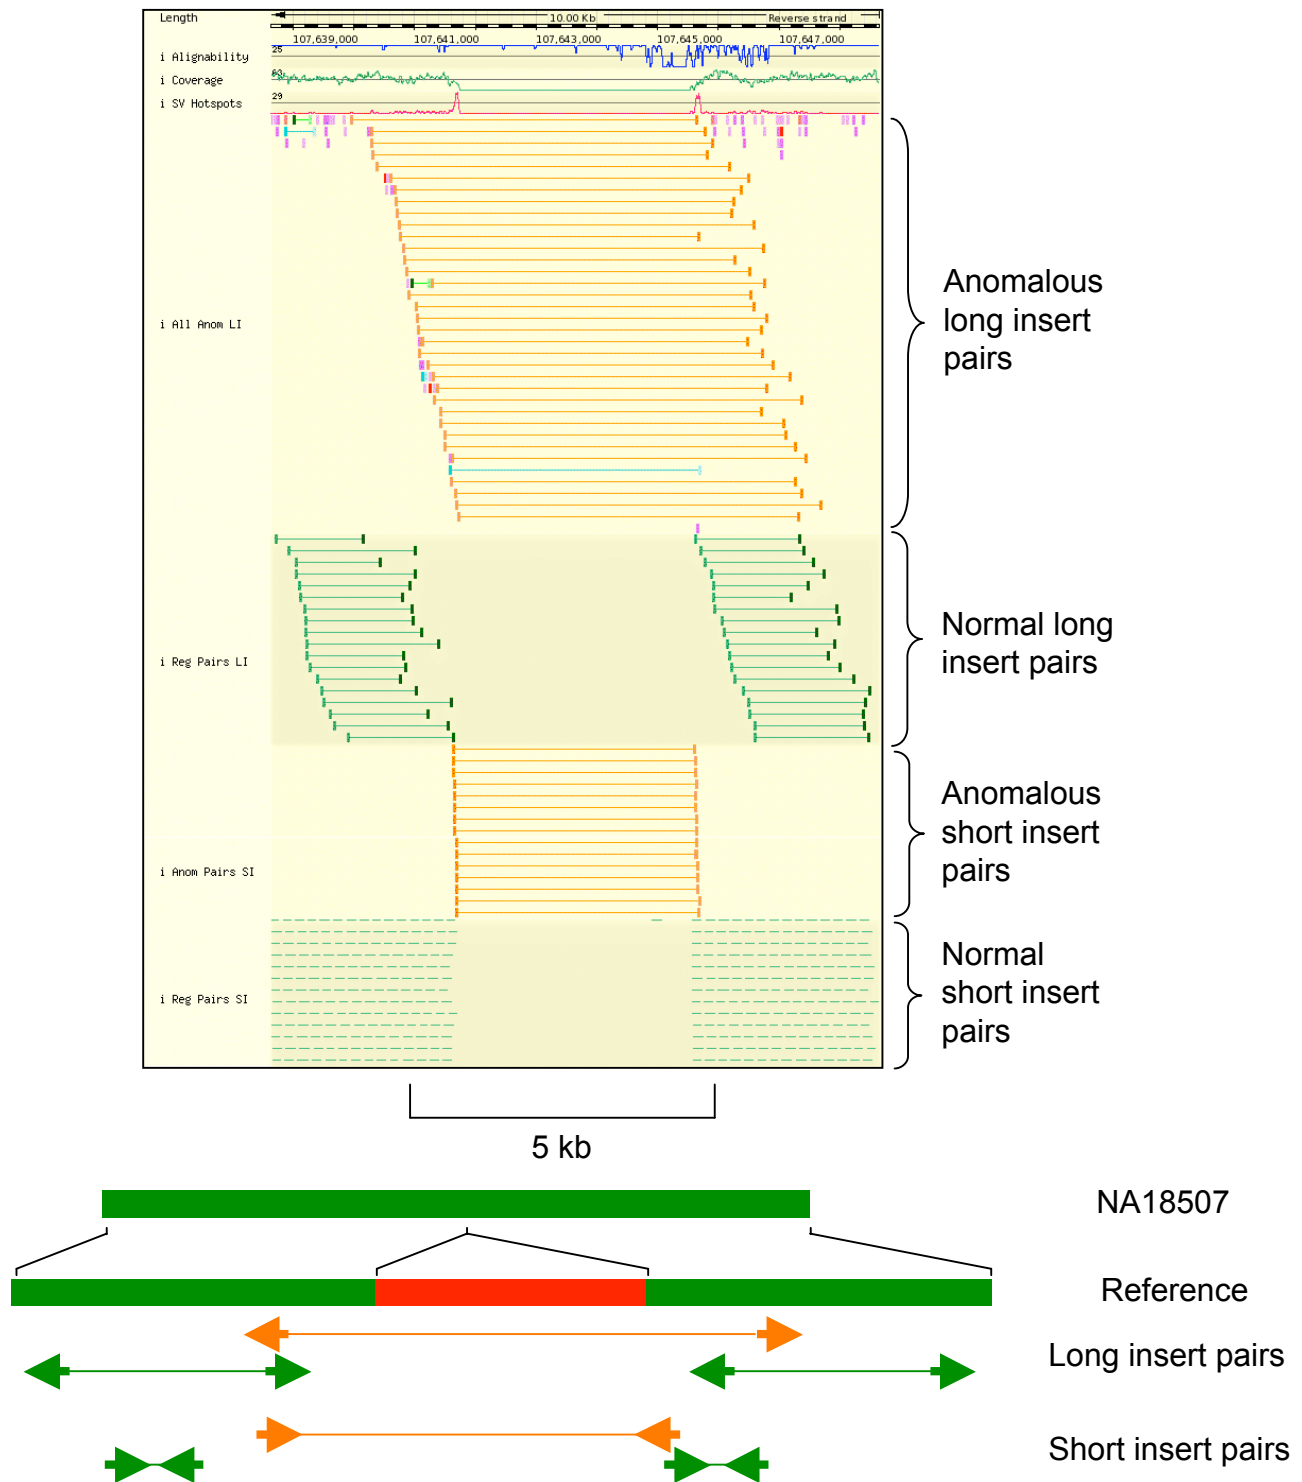

**Figure S17a.** Homozygous 3.6 kb deletion in NA18507 relative to the reference, supported by anomalously spaced long and short insert read pairs (orange) compared to regularly spaced read pairs (green). See also the schematic below. Note that the correct read orientation for long insert read pairs is different from that of the short insert read pairs and is denoted by the arrows which point in a 5' to 3' direction. See fig 1 for explanation. Note that this display is a composite of screen shots of the same window, overlapped for display purposes in this figure.

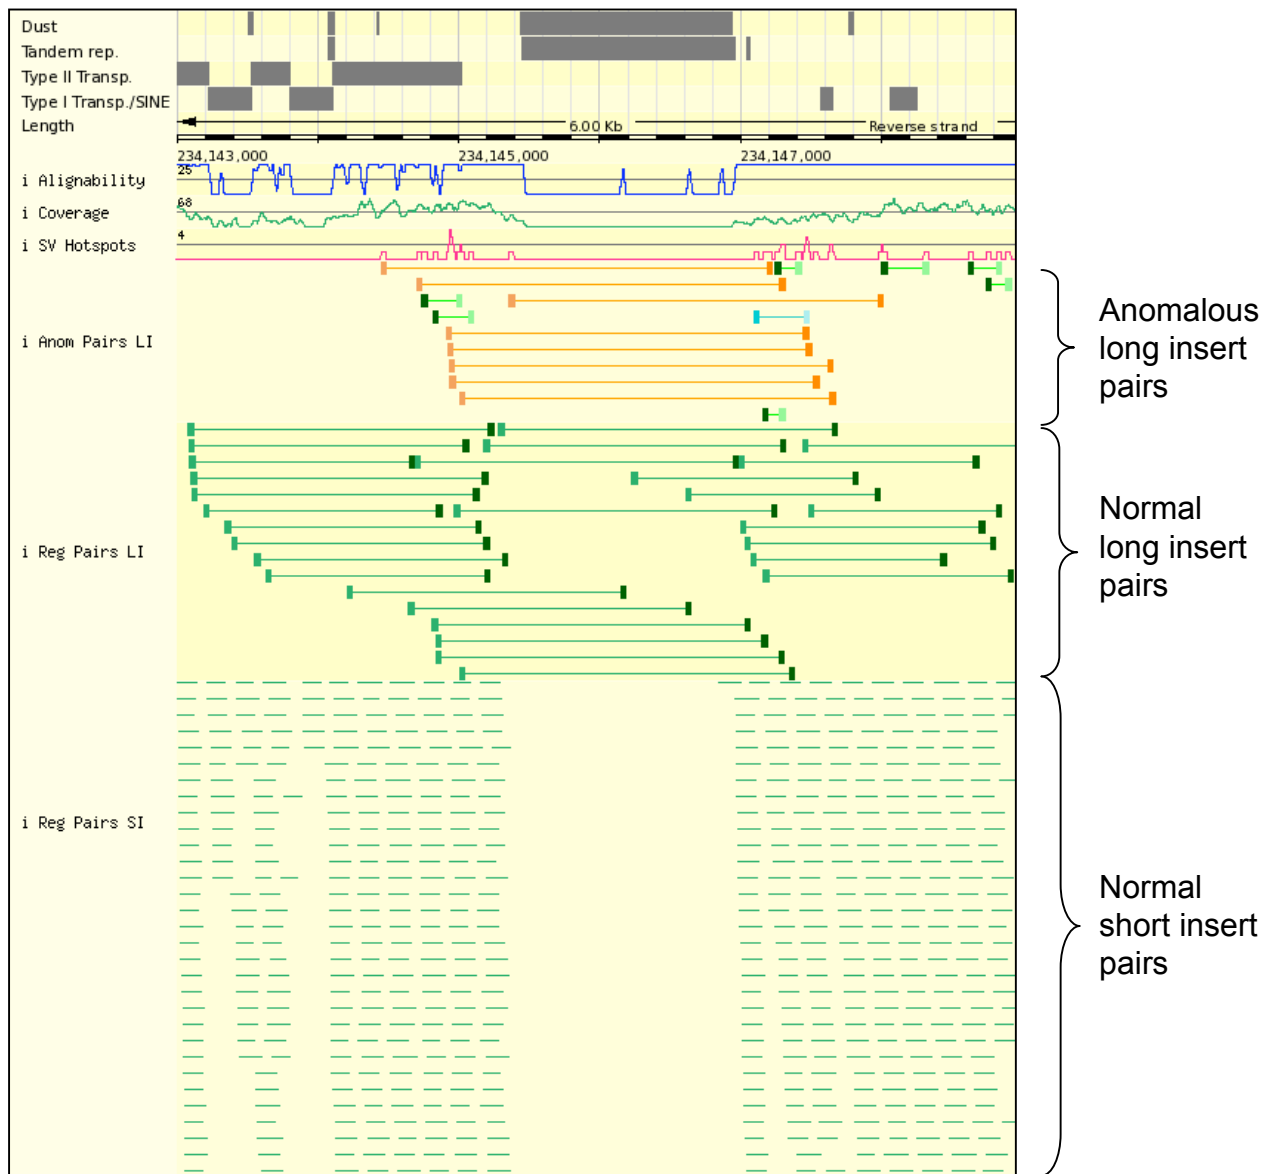

**Figure S17b.** Deletion in NA18507 relative to the reference, seen with anomalous long insert pairs but not short insert data. Tandem repeats (second row of display) cover ~1500 bp on the right hand side of the deletion, preventing unique alignment of reads. Short insert pairs are too short to span the tandem repeat region. Long insert pairs are longer range and right-hand reads map in unique sequence further away from the deletion (see orange blocks representing reads on right hand side of each of the long insert anomalous pairs). Note that this display is a composite of screen shots of the same window, overlapped for display purposes in this figure.

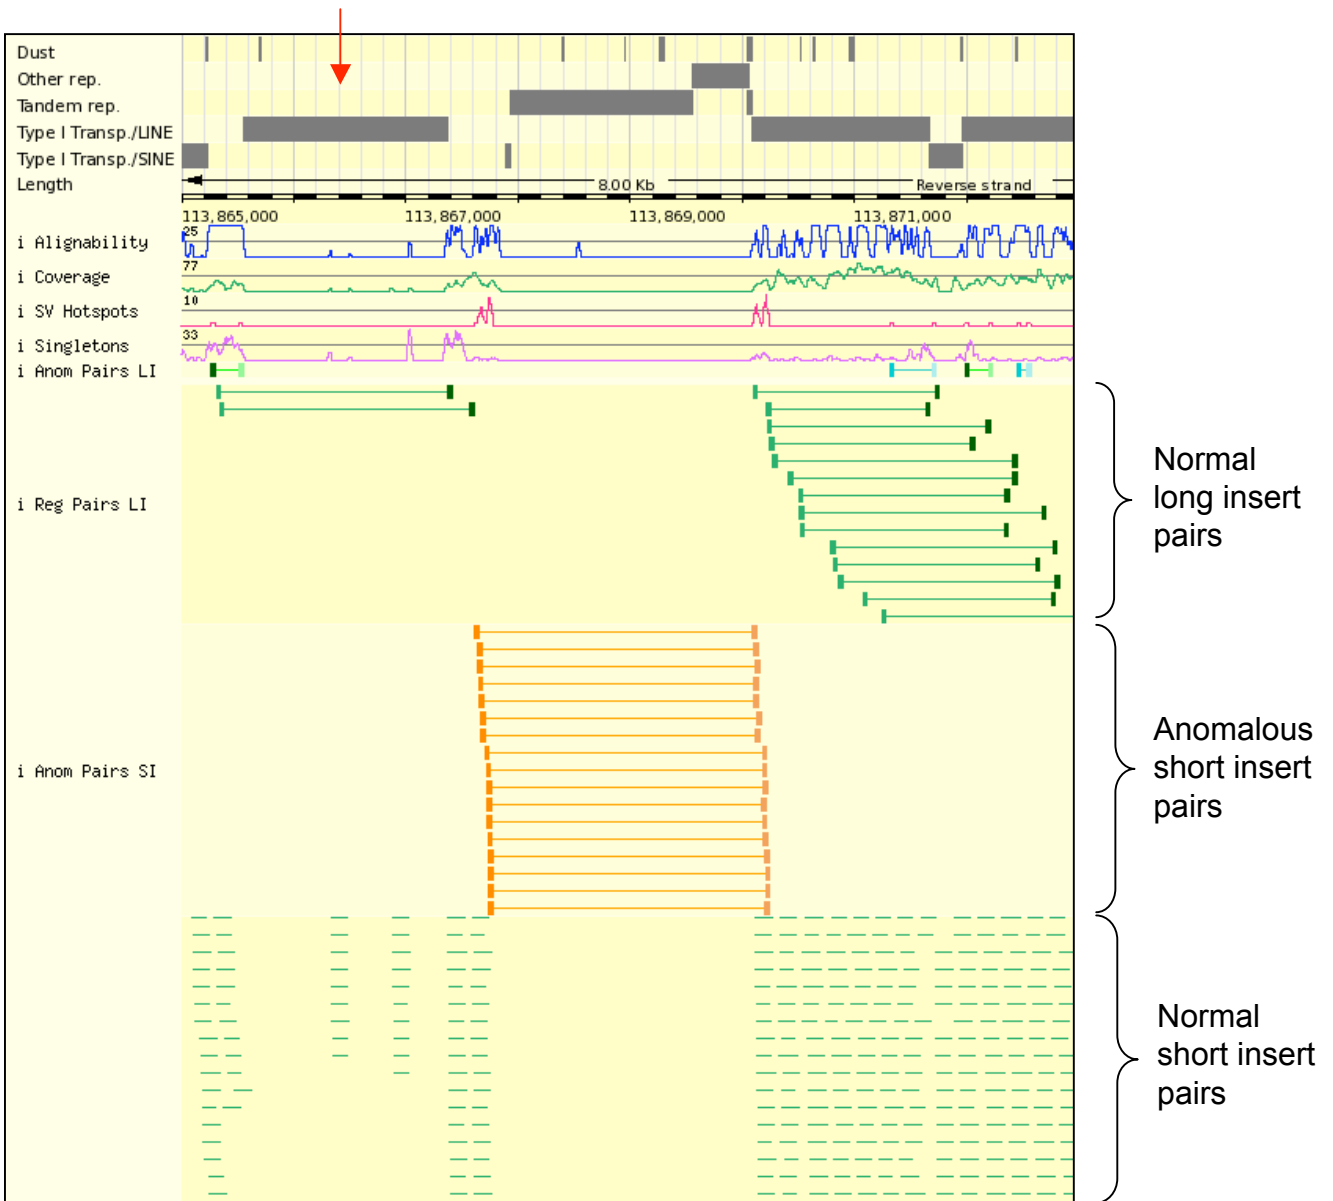

**Figure S17c.** Deletion in NA18507 relative to the reference, seen with anomalous short insert pairs but not long insert data. The LINE repeat on the left (see red arrow) covers 1.8 kb on the left-hand side of the deletion, preventing unique alignment of long insert reads. The higher density of short insert pairs includes a number of examples that map directly to either side of the deletion, with left ends mapping between the deletion breakpoint and the LINE repeat. Note that the LINE repeat on the right of the deletion does not appear to significantly compromise alignability (c.f. the LINE repeat on the left). Note that this display is a composite of screen shots of the same window, overlapped for display purposes in this figure.

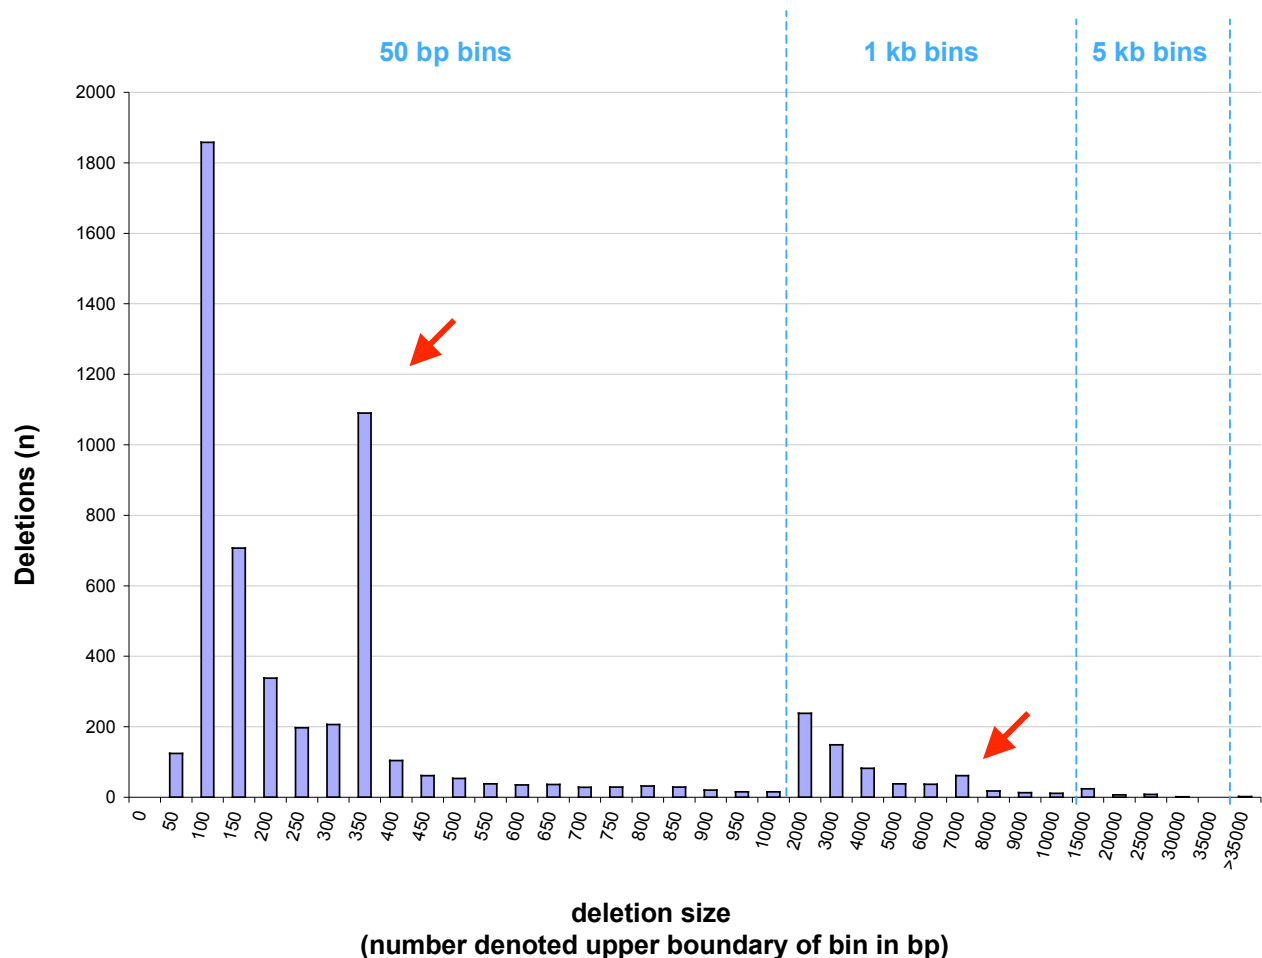

**Figure S18.** Size distribution of deletions in NA18507 relative to the reference. Two peaks in the distribution (arrowed) contain a substantial fraction of sequences corresponding to recently active retroposon insertions. The AluY family of SINEs are found in 90% (987/1092) of the 300-350bp fraction, and also contribute slightly to the 250-300 bp fraction. The L1HS LINE element accounts for 67% (42/61) of the 6-7 kb fraction. Note that other peaks are artefacts in the plot caused by the changes in size range of the bins.



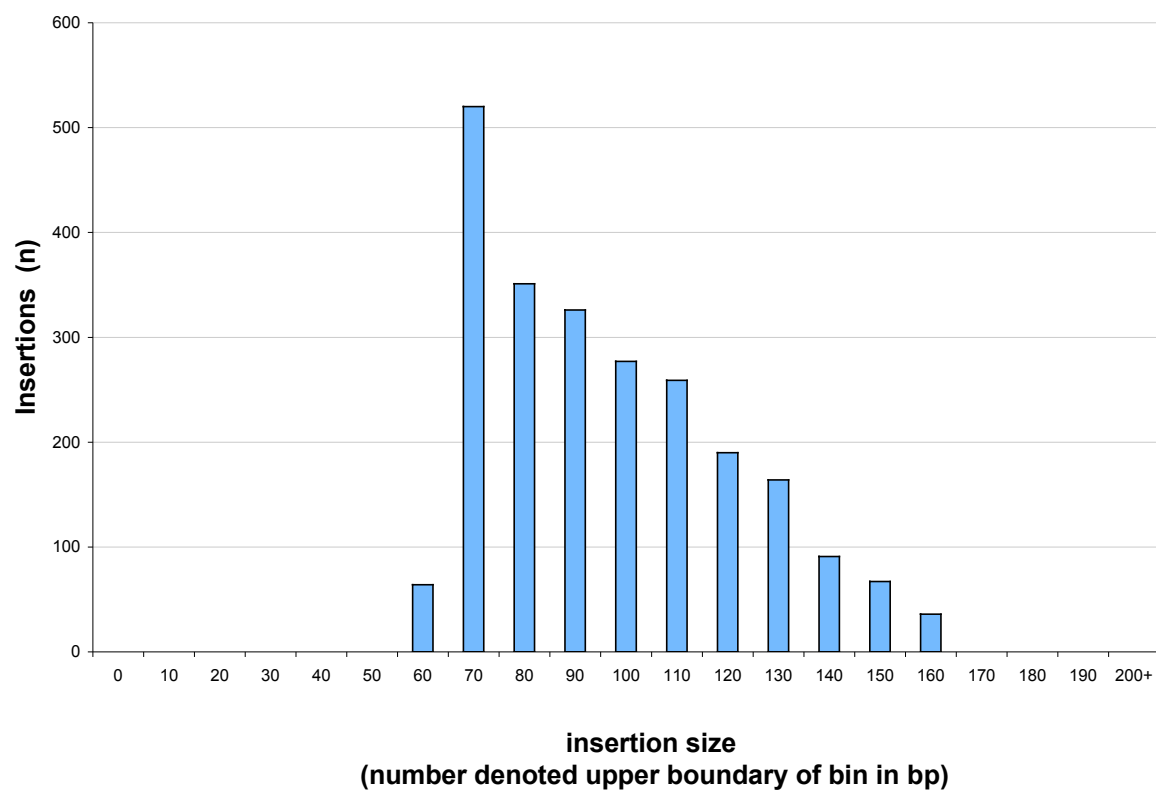

**Figure S19.** Size distribution of insertions in NA18507 relative to the reference, detected in the short insert dataset. Size distribution is limited by the resolution of analysis of the short insert fragment size range.

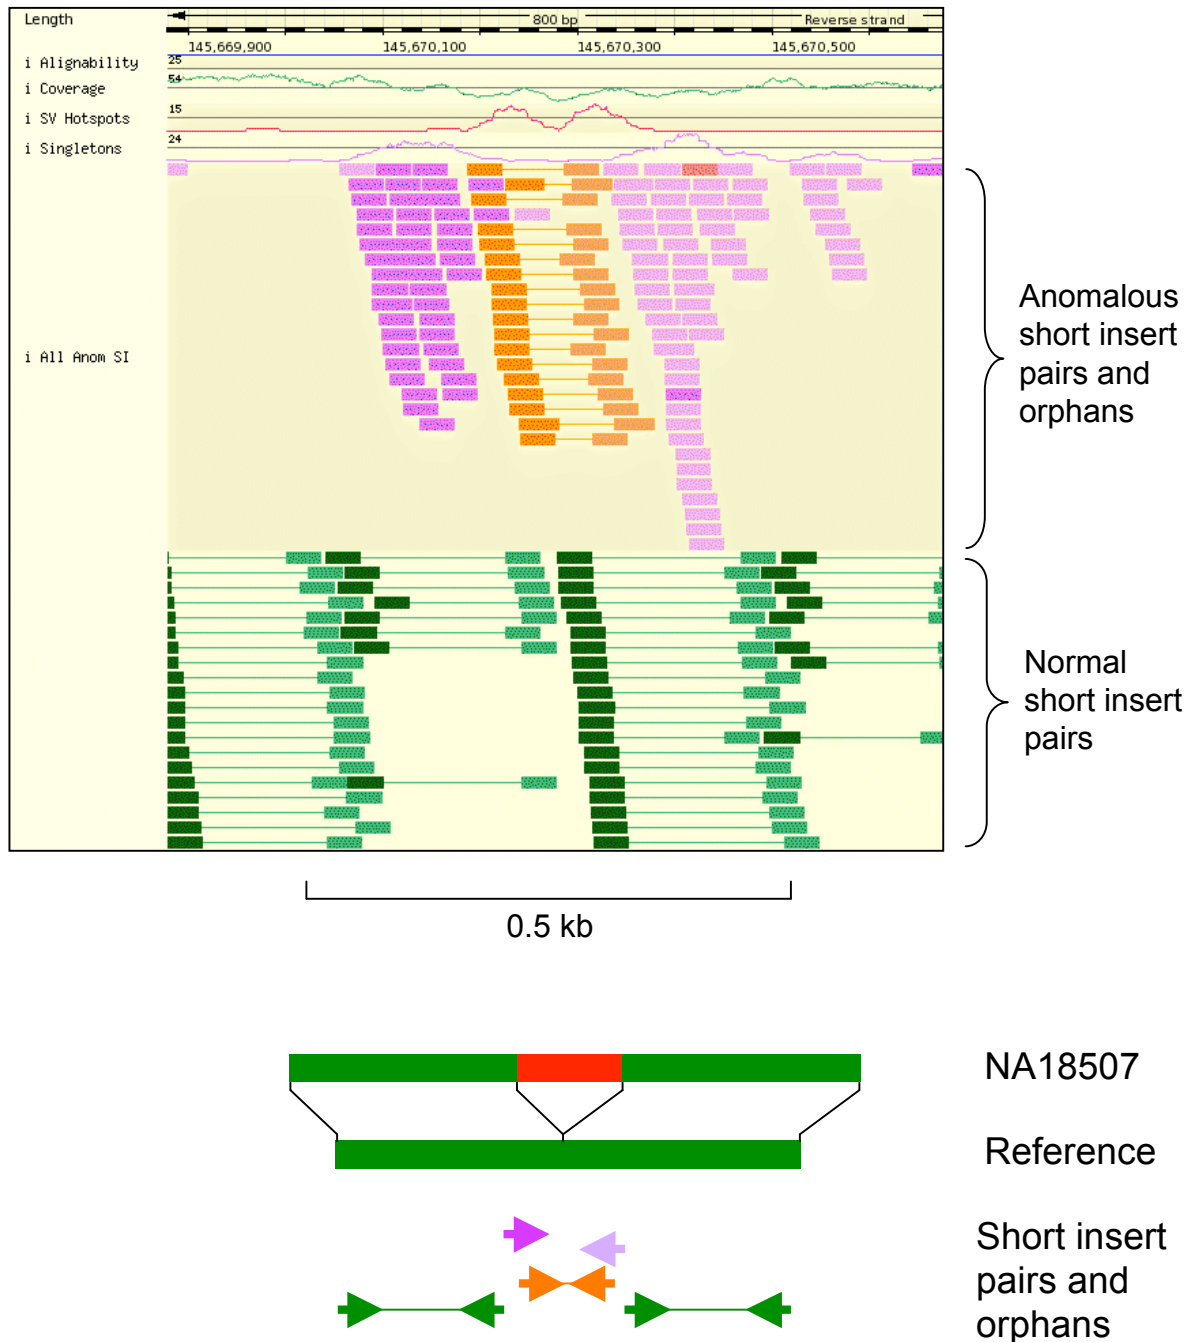

**Figure S20.** Homozygous 81 bp insertion detected by short insert data only. Orange bars show the anomalously short read pair spacing. Note the accumulation of singleton reads on either side, where each read has an unaligned pair. Dark and light purple denote rightwards and leftwards orientation (see schematic). Thus all singleton reads (dark purple) have unaligned pairs to the right of them; and vice versa for pale purple singletons. These unaligned pairs form part of the *de novo* assembly that results in a single contig across the sequence inserted in NA18507 relative to the reference (see fig S21). Note that this display is a composite of screen shots of the same window, overlapped for display purposes in this figure.

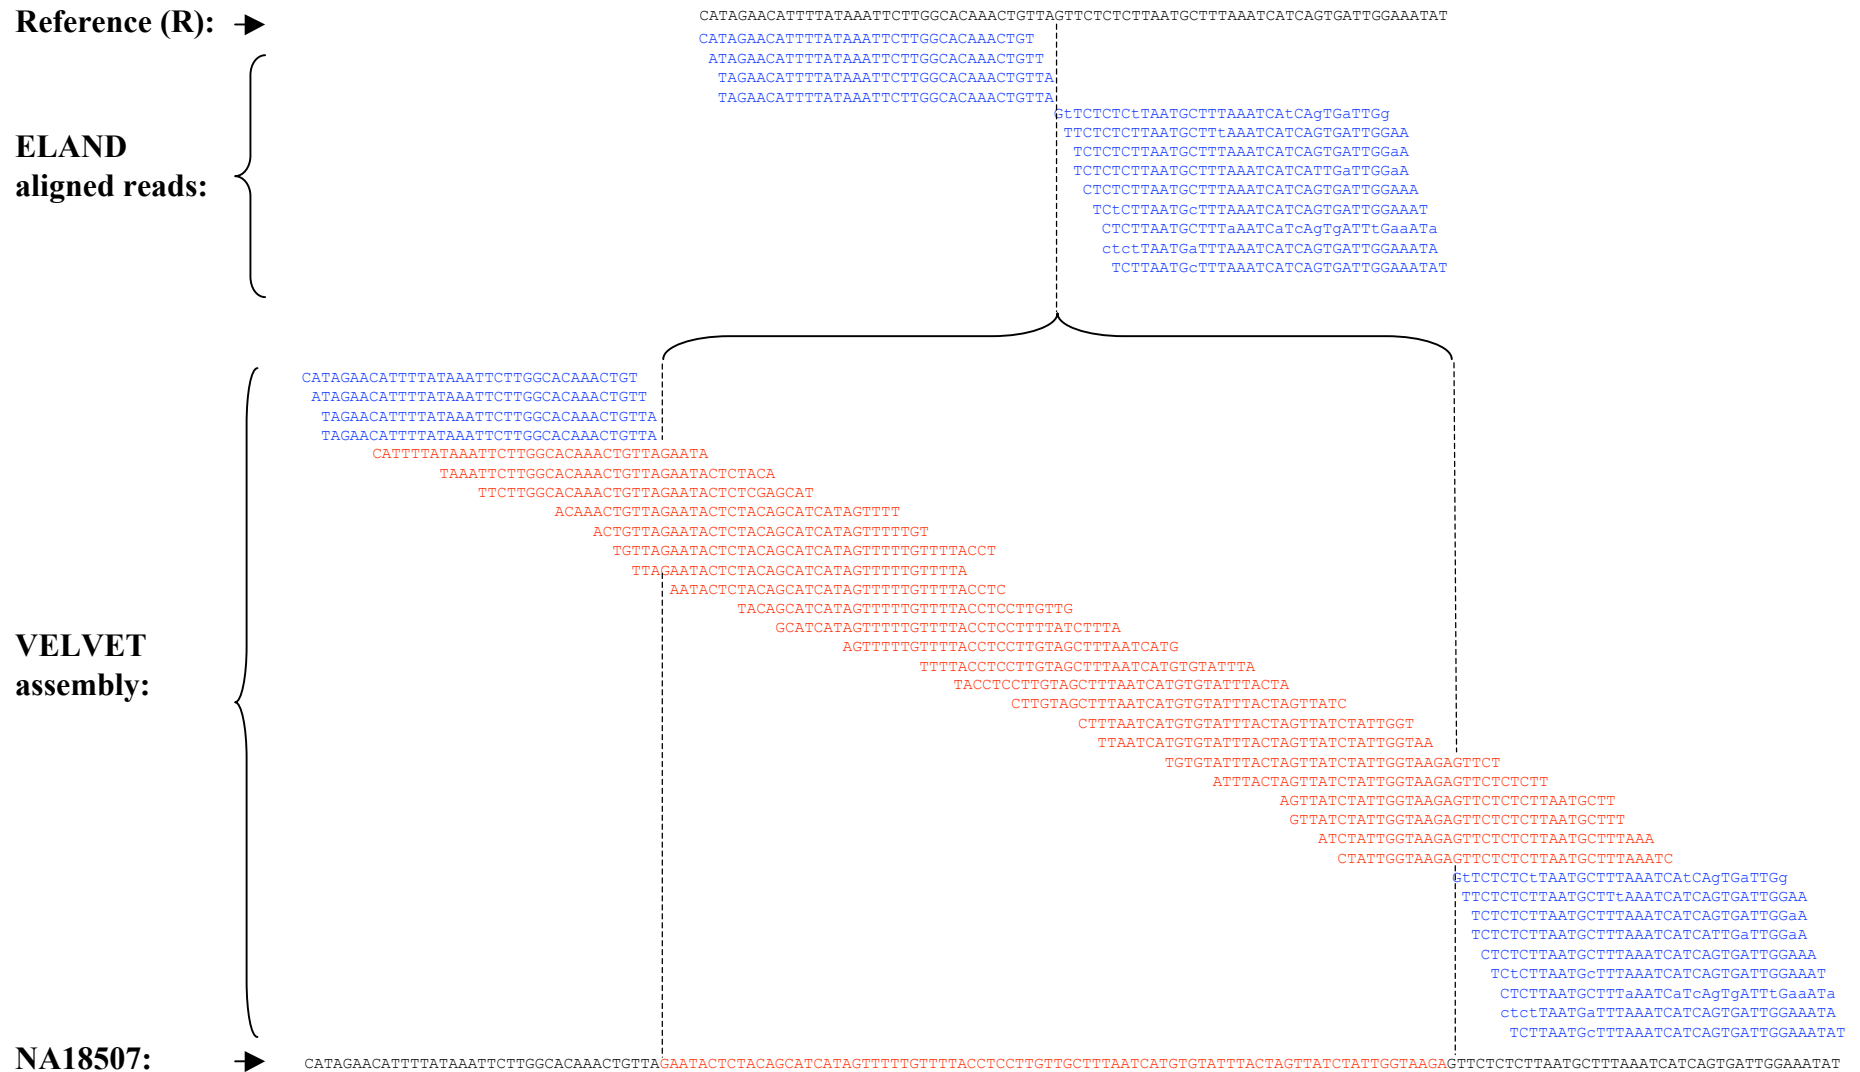

**Figure S21.** *De novo* assembly defines an inserted sequence in NA18507 absent from the reference. Bases present in the reference are in black, bases in NA18507 reads that align to the reference using ELAND are in blue, and bases in additional NA18507 reads that are assembled by VELVET are in red. The extra sequence in the NA18507 consensus (bottom line) is also shown in red.

**a** 071126\_EAS56\_0057\_FC200433 – lanes 1-8 read 1

| Lane Info |                     | Tile Mean +/- SD for Lane |                |                    |                                  |                |                |                      |                   |
|-----------|---------------------|---------------------------|----------------|--------------------|----------------------------------|----------------|----------------|----------------------|-------------------|
| Lane      | Lane Yield (kbases) | Clusters (raw)            | Clusters (PF)  | 1st Cycle Int (PF) | % intensity after 20 cycles (PF) | % PF Clusters  | % Align (PF)   | Alignment Score (PF) | % Error Rate (PF) |
| 1         | 266021              | 31482 +/- 1612            | 23032 +/- 1162 | 3646 +/- 318       | 99.39 +/- 3.25                   | 73.17 +/- 1.17 | 86.05 +/- 0.35 | 49.50 +/- 1.73       | 0.50 +/- 0.04     |
| 2         | 258725              | 30395 +/- 1596            | 22400 +/- 1396 | 3803 +/- 385       | 92.23 +/- 2.98                   | 73.68 +/- 1.84 | 86.03 +/- 0.39 | 48.68 +/- 2.21       | 0.53 +/- 0.07     |
| 3         | 262340              | 30436 +/- 1382            | 22713 +/- 1128 | 3610 +/- 370       | 98.04 +/- 3.36                   | 74.62 +/- 1.07 | 86.05 +/- 0.30 | 49.82 +/- 1.61       | 0.49 +/- 0.04     |
| 4         | 264384              | 30633 +/- 1697            | 22890 +/- 1321 | 4111 +/- 372       | 94.06 +/- 3.44                   | 74.77 +/- 2.69 | 86.23 +/- 0.29 | 50.01 +/- 1.57       | 0.48 +/- 0.06     |
| 5         | 266557              | 30793 +/- 1492            | 23078 +/- 1039 | 4278 +/- 388       | 94.15 +/- 3.64                   | 74.97 +/- 0.94 | 86.09 +/- 0.27 | 50.36 +/- 1.01       | 0.48 +/- 0.02     |
| 6         | 261586              | 30493 +/- 1656            | 22648 +/- 1194 | 4294 +/- 403       | 94.10 +/- 3.25                   | 74.30 +/- 1.68 | 86.14 +/- 0.44 | 48.53 +/- 3.00       | 0.50 +/- 0.15     |
| 7         | 261867              | 30502 +/- 1835            | 22672 +/- 1180 | 4056 +/- 469       | 96.64 +/- 3.85                   | 74.39 +/- 1.76 | 86.12 +/- 0.29 | 50.04 +/- 1.52       | 0.49 +/- 0.03     |
| 8         | 67955               | 30168 +/- 1697            | 21815 +/- 1276 | 3629 +/- 950       | 96.75 +/- 4.11                   | 72.36 +/- 2.69 | 86.11 +/- 0.30 | 49.81 +/- 1.89       | 0.50 +/- 0.04     |

**b** 071126\_EAS56\_0057\_FC200433 – lanes 1-8 read 2

| Lane Info |                     | Tile Mean +/- SD for Lane |                |                    |                                  |                |                |                      |                   |
|-----------|---------------------|---------------------------|----------------|--------------------|----------------------------------|----------------|----------------|----------------------|-------------------|
| Lane      | Lane Yield (kbases) | Clusters (raw)            | Clusters (PF)  | 1st Cycle Int (PF) | % intensity after 20 cycles (PF) | % PF Clusters  | % Align (PF)   | Alignment Score (PF) | % Error Rate (PF) |
| 1         | 266021              | 31482 +/- 1612            | 23032 +/- 1162 | 1954 +/- 174       | 92.80 +/- 6.94                   | 73.17 +/- 1.17 | 84.17 +/- 0.88 | 42.70 +/- 2.70       | 0.75 +/- 0.11     |
| 2         | 258725              | 30395 +/- 1596            | 22400 +/- 1396 | 2109 +/- 206       | 89.61 +/- 6.56                   | 73.68 +/- 1.84 | 84.45 +/- 1.06 | 42.62 +/- 3.25       | 0.74 +/- 0.14     |
| 3         | 262340              | 30436 +/- 1382            | 22713 +/- 1128 | 2045 +/- 190       | 95.16 +/- 5.93                   | 74.62 +/- 1.07 | 84.65 +/- 0.48 | 44.50 +/- 2.08       | 0.67 +/- 0.06     |
| 4         | 264384              | 30633 +/- 1697            | 22890 +/- 1321 | 2338 +/- 220       | 90.64 +/- 5.90                   | 74.77 +/- 2.69 | 84.97 +/- 0.39 | 45.20 +/- 2.11       | 0.64 +/- 0.05     |
| 5         | 266557              | 30793 +/- 1492            | 23078 +/- 1039 | 2260 +/- 220       | 92.23 +/- 5.66                   | 74.97 +/- 0.94 | 84.59 +/- 0.55 | 44.61 +/- 2.19       | 0.68 +/- 0.10     |
| 6         | 261586              | 30493 +/- 1656            | 22648 +/- 1194 | 2345 +/- 216       | 90.92 +/- 5.23                   | 74.30 +/- 1.68 | 84.81 +/- 0.74 | 44.47 +/- 2.63       | 0.67 +/- 0.08     |
| 7         | 261867              | 30502 +/- 1835            | 22672 +/- 1180 | 2209 +/- 244       | 93.00 +/- 5.65                   | 74.39 +/- 1.76 | 84.56 +/- 0.50 | 44.30 +/- 2.51       | 0.70 +/- 0.07     |
| 8         | 67955               | 30168 +/- 1697            | 21815 +/- 1276 | 1945 +/- 524       | 95.72 +/- 6.79                   | 72.36 +/- 2.69 | 84.41 +/- 0.78 | 43.70 +/- 2.72       | 0.72 +/- 0.08     |

**Table S1.** Summary tables for **a** read 1 and **b** read 2 of a production sequencing run of human DNA sample NA18507. For each of lanes 1-7, 330 tiles of data were collected and each tile contained approximately 22,000-23,000 clusters providing PF sequence. Lane yield = all PF clusters per lane (n) x read length (0.035 kbases). First cycle intensity (Int) is averaged over all PF reads and given in arbitrary units. % intensity after 20 cycles provides a measure of signal loss during the run. The % PF clusters indicates the fraction of raw clusters that provide PF sequence data after purity filtering (described in supplementary methods). The % align indicates what fraction of the PF reads align to the reference (in this case human genome ncbi36) using ELAND. This value will vary for different reference sequences. The % Error Rate is the average % differences for all bases in the PF dataset when compared to the reference, and includes all differences due true polymorphisms as well as alignment errors and sequence errors. The yield for this run was 3.8 Gb of PF sequence data.

|                                                 | ELAND |               | MAQ   |               |
|-------------------------------------------------|-------|---------------|-------|---------------|
|                                                 | N     | %             | N     | %             |
| All PF reads                                    | 278.6 | 100.0%        | 278.6 | 100.0%        |
| PF reads aligning to genome                     | 239.3 | 85.9%         | 267.4 | 96.0%         |
| Non duplicate PF reads aligning to genome       | 216.8 | 77.8% (90.6%) | 236.7 | 85.0% (88.5%) |
| Non duplicate PF reads aligning to X chromosome | 191.9 | 68.9% (88.5%) | 203.9 | 73.2% (86.2%) |

**Table S2.** Distribution of reads in flow-sorted X chromosome analysis. Number of reads N is given in millions. Percent values not in brackets are fraction of the total number of reads (top line value for N). Percent values in (brackets) express the proportion of reads as a fraction of the category on the previous line. Thus using ELAND, non duplicate PF reads aligning to genome are 90.6% of all PF reads aligning to genome. They represent 77.8% of all PF reads.

|                     |                    | Genotyped<br>n | ELAND     |         | MAQ       |         |
|---------------------|--------------------|----------------|-----------|---------|-----------|---------|
|                     |                    |                | Loci<br>n | %       | Loci<br>n | %       |
| Covered by sequence | Homozygote         | 8,887          | 8,865     | 99.75%  | 8,885     | 99.98%  |
|                     | Heterozygote       | 4,717          | 4,708     | 99.81%  | 4,707     | 99.79%  |
|                     | All                | 13,604         | 13,573    | 99.77%  | 13,592    | 99.91%  |
| Concordant calls    | Homozygote         |                | 8,865     | 100.00% | 8,885     | 100.00% |
|                     | Heterozygote       |                | 4,643     | 98.62%  | 4,706     | 99.98%  |
|                     | All                |                | 13,508    | 99.52%  | 13,591    | 99.99%  |
| All disagreements   |                    |                | 65        | 0.48%   | 1         | 0.01%   |
|                     | GT>Seq             |                | 65        | 0.48%   | 1         | 0.01%   |
|                     | Seq>GT             |                | 0         | 0.00%   | 0         | 0.00%   |
|                     | Other discordances |                | 0         | 0.00%   | 0         | 0.00%   |

**Table S3.** Comparison of X chromosome SNP calls made from sequence vs. genotype data. Genotyping of the NA07340 sample was carried out using the Illumina HumanHap550 BeadChip. GT>Seq denotes a heterozygous genotyping SNP call where there is a homozygous sequencing SNP call (one of the two alleles); Seq>GT denotes the converse, i.e. a heterozygous sequencing SNP call where there is a homozygous genotyping call. Other discordances are differences in the two SNP calls that cannot be accounted for by one allele being missing from one call.

| Left end | Right end | Length | MAQ APs | ELAND APs | Type | Repeat | Depth | Ext. evi |
|----------|-----------|--------|---------|-----------|------|--------|-------|----------|
| 402924   | 403049    | 130    | 9       | 5         | hom  |        | 1     | 3,4      |
| 435713   | 436369    | 630    | 11      | 3         | hom  |        | 0     | 4        |
| 823102   | 823947    | 888    | 7       | 8         | het  |        | 1     |          |
| 827894   | 828076    | 167    | 9       | 10        | hom  |        | 0     |          |
| 830122   | 830892    | 735    | 5       | 3         | het  |        | 1     |          |
| 1130746  | 1131006   | 348    | 17      | 9         | het  |        | 0     |          |
| 1574560  | 1574825   | 226    | 10      | 7         | hom  |        | 0     |          |
| 1871088  | 1871680   | 628    | 4       | 9         | het  |        | 1     | 4        |
| 2204889  | 2204968   | 173    | 5       | 7         | het  |        | 1     | 4        |
| 2618720  | 2618890   | 201    | 12      | 6         | hom  |        | 1     | 4        |
| 3044385  | 3044590   | 194    | 9       | 3         | hom  |        | 0     | 4        |
| 4536875  | 4537115   | 248    | 13      | 11        | hom  |        | 1     | 3,4      |
| 4914723  | 4915023   | 328    | 29      | 24        | hom  | AluYa5 | 0     | 2,3      |
| 5065353  | 5067496   | 2164   | 27      | 24        | het  |        | 1     | 4        |
| 5580355  | 5580671   | 356    | 58      | 50        | hom  | AluYa5 | 1     | 1,2,3,4  |
| 6730947  | 6731159   | 182    | 5       | 2         | hom  |        | 0     | 3,4      |
| 8746525  | 8748362   | 2349   | 6       | 12        | het  |        | 1     | 4        |
| 9720010  | 9720194   | 158    | 8       | 7         | hom  |        | 1     | 3        |
| 11635293 | 11641318  | 6069   | 36      | 35        | hom  | L1HS   | 1     | 1,3,4    |
| 11863127 | 11869352  | 6258   | 57      | 42        | hom  | L1HS   | 1     | 1,4      |
| 16337623 | 16338127  | 550    | 47      | 37        | hom  | L1HS   | 1     | 1,3      |
| 17430556 | 17430853  | 336    | 61      | 47        | hom  | AluY   | 1     | 1,3      |
| 22582505 | 22582796  | 334    | 34      | 25        | hom  | AluY   | 1     |          |
| 32380501 | 32380550  | 172    | 6       | 3         | hom  |        | 0     |          |
| 33118510 | 33118820  | 332    | 31      | 29        | hom  | AluYb8 | 1     | 2,3      |
| 38281972 | 38282205  | 222    | 3       | 6         | het  |        | 1     |          |
| 38469315 | 38473453  | 4170   | 3       | 6         | het  |        | 1     | 3,4      |
| 39520762 | 39521076  | 295    | 5       | 5         | hom  |        | 1     | 1,2,3    |
| 45472524 | 45472804  | 320    | 58      | 54        | hom  | AluY   | 1     | 2,3      |
| 52904522 | 52906807  | 2288   | 11      | 8         | het  |        | 0     |          |
| 58406935 | 58407152  | 200    | 1       | 6         | hom  |        | 0     | 3        |
| 66020510 | 66020630  | 154    | 18      | 15        | het  |        | 0     | 3        |
| 66250543 | 66250693  | 197    | 51      | 45        | hom  |        | 1     | 1,3,4    |
| 71039962 | 71040256  | 342    | 72      | 51        | hom  | AluYa5 | 1     | 2,3,4    |
| 75946512 | 75946687  | 200    | 20      | 14        | het  |        | 0     |          |
| 77583524 | 77584097  | 614    | 63      | 46        | hom  | L1HS   | 1     | 3        |
| 78833108 | 78835525  | 2408   | 16      | 25        | hom  |        | 1     | 4        |
| 80929136 | 80929745  | 610    | 7       | 8         | het  |        | 1     | 1,3,4    |
| 80983316 | 80989344  | 6067   | 13      | 11        | hom  | L1HS   | 0     | 4        |
| 84229771 | 84229872  | 134    | 11      | 6         | hom  |        | 1     |          |
| 86165708 | 86166809  | 1116   | 23      | 24        | hom  |        | 1     | 1        |
| 86173414 | 86173872  | 478    | 7       | 7         | het  |        | 1     |          |
| 88239424 | 88239563  | 166    | 13      | 27        | het  |        | 1     |          |
| 89794851 | 89795060  | 159    | 5       | 5         | het  |        | 0     | 4        |

Table S4 (part 1 of 2). See part 2 for legend.

**Table S4 (part 2 of 2).** Analysis of structural variants in X chromosome data for NA07340. Maq or Eland APs refer to the number of anomalous pairs (APs) that support the variant. A variant was called if the number of APs was 5 or more in one analysis. Thereafter, supporting data in the other analysis is recorded if there are 1 or more APs in the other analysis. Depth indicates if there was evidence for the variant on the basis of read depth (1) or not (0) in addition to the AP data. Overlap with independent datasets is indicated in the final column by 1: Evidence for a variant obtained from split fosmid reads from the same DNA detected by alignment to the reference using Ssaha; 2: entry in dbRIP; 3, entry in DGVindel (see refs 15, 23) or 4: Database of Genomic Variants. We found 39 variants in the present dataset that were supported by evidence from independent analyses of category 1, 2 or 3. Note in the case of 4 that the overlap can be across a very large region and provides corroboration but does not necessarily constitute strong supporting evidence for detection of the same event.



| start <sup>1</sup> | length <sup>1</sup> | Reference copy number in region at read-length (32 bp) resolution | Copy number difference in NA07340 (diploid) <sup>2</sup> | Corroborated by external data <sup>3</sup> |
|--------------------|---------------------|-------------------------------------------------------------------|----------------------------------------------------------|--------------------------------------------|
| 4000               | 12000               | Mostly 2                                                          | loss (-2)                                                | 1                                          |
| 16375              | 18350               | Variable between 20 and 120                                       | gain (+++)                                               |                                            |
| 80000              | 15000               | Mostly 2                                                          | loss (-2)                                                |                                            |
| 97000              | 9000                | Variable between 20 and 120                                       | gain (+++)                                               |                                            |
| 408025             | 1200                | Approximately 40                                                  | gain (+++)                                               | 2                                          |
| 930225             | 750                 | Variable between 10 and 120                                       | gain (+++)                                               |                                            |
| 950000             | 180000              | At least 2                                                        | loss (-2)                                                |                                            |
| 1715775            | 4500                | Approximately 25                                                  | loss (---)                                               |                                            |
| 3750000            | 120000              | At least 2                                                        | loss (-2)                                                | 2                                          |
| 9332000            | 11000               | Mixture of 5 and 10                                               | gain (+++)                                               | 1,2                                        |
| 19375625           | 4000                | Mostly unique                                                     | loss (-1)                                                | 1                                          |
| 48771725           | 3900                | Mostly 2                                                          | loss (-2)                                                | 2                                          |
| 49050000           | 210000              | Tandem repeat of 16 units                                         | gain (+++)                                               |                                            |
| 49708725           | 300                 | Approximately 15                                                  | gain (+++)                                               | 1                                          |
| 52100000           | 500000              | Mixture of 2 and 5                                                | loss (--)                                                |                                            |
| 52844000           | 6000                | Variable between 2 and 10                                         | loss (--)                                                |                                            |
| 55220000           | 50000               | Variable between 2 and 10                                         | gain (+++)                                               |                                            |
| 56810000           | 14000               | Variable between 3 and 5                                          | gain (++)                                                | 1,2                                        |
| 62250000           | 180000              | Mixture of 2 and 10                                               | gain(+2)                                                 | 1,2                                        |
| 69378925           | 8450                | Mostly unique                                                     | gain (+1)                                                | 1                                          |
| 73025525           | 200                 | At least 10                                                       | gain (+++)                                               |                                            |
| 77402000           | 10000               | Mostly unique                                                     | loss (-1)                                                | 1                                          |
| 81868975           | 5950                | At least 5                                                        | loss (---)                                               | 1                                          |
| 88344000           | 6000                | Variable up to 45                                                 | gain (+++)                                               | 1                                          |
| 96493275           | 2050                | Mostly unique                                                     | loss (-2)                                                | 1                                          |
| 101253375          | 150                 | At least 10                                                       | gain (+++)                                               |                                            |
| 114860000          | 60000               | Tandem repeat of 20 units                                         | gain (+++)                                               | 1,2                                        |
| 118758025          | 3500                | Mostly unique                                                     | loss (-2)                                                | 1                                          |
| 119893875          | 54650               | Tandem repeat of 12 units                                         | loss (---)                                               | 2                                          |
| 125433375          | 1550                | Variable between 2 and 6                                          | gain (+++)                                               | 2                                          |
| 130832975          | 3300                | Mostly unique                                                     | loss (-2)                                                | 1                                          |
| 134670000          | 130000              | Variable between 2 and 12                                         | gain (++)                                                | 2                                          |
| 139633075          | 400                 | Variable between 2 and 10                                         | gain (+++)                                               |                                            |
| 146168000          | 9000                | Mostly 2                                                          | gain (++)                                                | 2                                          |
| 150831000          | 12000               | Variable up to 10                                                 | loss (-1)                                                |                                            |
| 154430975          | 8650                | Mostly unique                                                     | loss (-1)                                                | 1,2                                        |
| 154866825          | 4050                | At least 2                                                        | gain (++)                                                |                                            |
| 154913225          | 350                 | At least 90                                                       | gain (+++)                                               |                                            |

**Table S5.** Analysis of structural variants in X chromosome data for NA07340 based on read depth only.

<sup>1</sup> There is some imprecision in the definition of the breakpoints as genomic windows are assessed.

<sup>2</sup> ++/-- = 3 to 8 additional/fewer copies; +++/--- = more than 8 additional/fewer copies.

<sup>3</sup> 1 = CGH, 2 = Database of Genomic Variants

***a***

|                                           | ELAND        |               | MAQ          |               |
|-------------------------------------------|--------------|---------------|--------------|---------------|
|                                           | n (billions) | %             | n (billions) | %             |
| All PF reads                              | 3.77         | 100.0%        | 3.77         | 100.0%        |
| PF reads aligning to genome               | 3.41         | 90.5%         | 3.66         | 97.1%         |
| Non duplicate PF reads aligning to genome | 3.14         | 83.3% (92.0%) | 3.33         | 88.3% (91.0%) |

***b***

|                                           | ELAND        |               |
|-------------------------------------------|--------------|---------------|
|                                           | n (millions) | %             |
| All PF reads                              | 296.1        | 100.0%        |
| PF reads aligning to genome               | 270.7        | 91.4%         |
| Non duplicate PF reads aligning to genome | 228.6        | 77.2% (84.4%) |

**Table S6.** Summary of reads in human genome sequencing: ***a*** short insert library (208+/- 13 bp); ***b***. long insert library (1,840+/- 200bp). The numbers in parentheses shows % retained from the category on the preceding line.

**a**

| HM550 COMPARISON    |              | Genotyped<br>n | ELAND     |        | MAQ       |        |
|---------------------|--------------|----------------|-----------|--------|-----------|--------|
|                     |              |                | Loci<br>n | %      | Loci<br>n | %      |
| Covered by sequence | Homozygote   | 390,585        | 389,139   | 99.63% | 389,909   | 99.83% |
|                     | Heterozygote | 162,125        | 161,357   | 99.53% | 161,359   | 99.53% |
|                     | All          | 552,710        | 550,496   | 99.60% | 551,268   | 99.74% |
| Concordant calls    | Homozygote   |                | 388,798   | 99.91% | 389,609   | 99.92% |
|                     | Heterozygote |                | 159,317   | 98.74% | 161,115   | 99.85% |
|                     | All          |                | 548,115   | 99.57% | 550,724   | 99.90% |
| All disagreements   |              |                | 2,381     | 0.43%  | 544       | 0.10%  |
| GT>Seq              |              |                | 1,940     | 0.35%  | 170       | 0.03%  |
| Seq>GT              |              |                | 258       | 0.05%  | 290       | 0.05%  |
| Other discordances  |              |                | 183       | 0.03%  | 84        | 0.02%  |

**b**

| HM-All COMPARISON   |              | Genotyped<br>n | ELAND     |        | MAQ       |        |
|---------------------|--------------|----------------|-----------|--------|-----------|--------|
|                     |              |                | Loci<br>n | %      | Loci<br>n | %      |
| Covered by sequence | Homozygote   | 2,901,392      | 2,876,278 | 99.13% | 2,882,021 | 99.33% |
|                     | Heterozygote | 798,200        | 795,041   | 99.60% | 791,434   | 99.15% |
|                     | All          | 3,699,592      | 3,671,319 | 99.24% | 3,673,455 | 99.29% |
| Concordant calls    | Homozygote   |                | 2,851,483 | 99.14% | 2,855,192 | 99.07% |
|                     | Heterozygote |                | 775,708   | 97.57% | 785,757   | 99.28% |
|                     | All          |                | 3,627,191 | 98.80% | 3,640,949 | 99.12% |
| All disagreements   |              |                | 44,136    | 1.20%  | 32,506    | 0.88%  |
| GT>Seq              |              |                | 16,821    | 0.46%  | 5,602     | 0.15%  |
| Seq>GT              |              |                | 19,268    | 0.52%  | 19,679    | 0.54%  |
| Other discordances  |              |                | 8,047     | 0.22%  | 7,225     | 0.20%  |

**Table S7.** Detailed breakdown of comparison of human genome SNP calls made from sequence vs. genotype data. Genotype data were generated using the Infinium HumanHap550 BeadChip (HM550) (**a**); or obtained from the International HapMap Project (HM-All) (**b**). GT>Seq denotes a heterozygous genotyping SNP call where there is a homozygous sequencing SNP call (one of the two alleles); Seq>GT denotes the converse, i.e. a heterozygous sequencing SNP call where there is a homozygous genotyping call. Other discordances are differences in the two SNP calls that cannot be accounted for by one allele being missing from one call.

|                    |              | SNP calls |       |
|--------------------|--------------|-----------|-------|
|                    |              | n         | %     |
| Genotyped loci     | Homozygote   | 309       |       |
|                    | Heterozygote | 897       |       |
|                    | All          | 1206      |       |
| Concordant calls   | Homozygote   | 296       | 95.8% |
|                    | Heterozygote | 863       | 96.2% |
|                    | All          | 1159      | 96.1% |
| All disagreements  |              | 47        | 3.9%  |
|                    | GT>Seq       | 7         | 0.6%  |
|                    | Seq>GT       | 22        | 1.8%  |
| Other discordances |              | 18        | 1.5%  |

**Table S8.** Validation of novel SNP calls by genotyping. Results for 1,206 randomly chosen novel SNP calls. There is 96.1% (1159/1206) concordance overall between sequencing and genotype calls. In all there were 47 discrepancies. GT>Seq denotes a heterozygous call by genotyping, where one of the alleles is detected by sequencing. These seven undercalls are considered to be false negatives. Seq>GT denotes the converse, i.e. a heterozygous sequencing SNP call where there is a homozygous genotyping call. On manual inspection we found that there were two classes of Seq>GT: Ten have nearby hidden SNPs and are therefore considered correct sequence calls. The other twelve lie in small indels that were missed in by the indel caller. These are therefore counted as false positive SNP calls in the present analysis. Other discordances are differences in the two SNP calls that cannot be accounted for by one allele being missing from one call and are also counted as false positives. The total false positive discovery rate among the novel SNPs in this analysis is therefore 2.4% (30/1206).

| chromosome | position  | call | ref | exon info (ensembl id) | gene       | change    | hom/het | known/novel |
|------------|-----------|------|-----|------------------------|------------|-----------|---------|-------------|
| c1         | 16895539  | A    | C   | exon:ENST00000270691   | ESPNP      | E638STOP  | HOM     | Known       |
| c1         | 20374169  | GA   | G   | exon:ENST00000247992   | Q5R387     | R27STOP   | HET     | Known       |
| c1         | 32034879  | GA   | G   | exon:ENST00000360482   | SPOCD1     | Q724STOP  | HET     | Novel       |
| c1         | 46853266  | AG   | G   | exon:ENST00000271139   | MOBKLC2    | R24STOP   | HET     | Known       |
| c1         | 54954888  | TA   | T   | exon:ENST00000395691   | C1orf175   | C1290STOP | HET     | Known       |
| c1         | 55023902  | GA   | G   | exon:ENST00000371274   | TTC22      | R342STOP  | HET     | Novel       |
| c1         | 86873963  | G    | C   | exon:ENST00000284054   | CLCA3      | Y84STOP   | HOM     | Known       |
| c1         | 89221456  | AT   | A   | exon:ENST00000321792   | NP62556.2  | Y214STOP  | HET     | Novel       |
| c1         | 100454229 | CA   | C   | exon:ENST00000370132   | DBT        | E224STOP  | HET     | Novel       |
| c1         | 110268078 | AG   | G   | exon:ENST00000369803   | CSF1       | W491STOP  | HET     | Known       |
| c1         | 111769644 | TC   | C   | exon:ENST00000369728   | OVGP1      | W131STOP  | HET     | Known       |
| c1         | 116028154 | CA   | C   | exon:ENST00000355485   | VANGL1     | S338STOP  | HET     | Novel       |
| c1         | 120138308 | CT   | C   | exon:ENST00000369402   | REG4       | W114STOP  | HET     | Known       |
| c1         | 143563747 | CT   | C   | exon:ENST00000369356   | PDE4DIP    | W2351STOP | HET     | Known       |
| c1         | 143626918 | GA   | G   | exon:ENST00000369356   | PDE4DIP    | R622STOP  | HET     | Known       |
| c1         | 156816116 | T    | C   | exon:ENST00000368150   | OR10X1     | W66STOP   | HOM     | Known       |
| c1         | 159359477 | GA   | G   | exon:ENST00000392188   | DEDD       | Q198STOP  | HET     | Novel       |
| c1         | 169379114 | T    | C   | exon:ENST00000236166   | FMO6P      | Q105STOP  | HOM     | Known       |
| c1         | 230165470 | CT   | C   | exon:ENST00000359647   | Q6ZRE3     | R116STOP  | HET     | Known       |
| c1         | 234772923 | AT   | T   | exon:ENST00000352231   | LGALS8     | L212STOP  | HET     | Known       |
| c1         | 246179649 | AT   | T   | exon:ENST00000357191   | OR2L8      | Y289STOP  | HET     | Known       |
| c1         | 246789346 | A    | G   | exon:ENST00000328570   | OR2T29     | Q24STOP   | HOM     | Novel       |
| c2         | 31252918  | CG   | G   | exon:ENST00000398824   | N/A        | Y708STOP  | HET     | Known       |
| c2         | 89400921  | GA   | G   | exon:ENST00000390263   | IGKV1-39   | R18STOP   | HET     | Known       |
| c2         | 95883315  | AG   | G   | exon:ENST00000357042   | Q53S06     | Q32STOP   | HET     | Known       |
| c2         | 159224979 | AG   | G   | exon:ENST00000342892   | Q6ZTQ2     | Q103STOP  | HET     | Novel       |
| c2         | 207528443 | AG   | G   | exon:ENST00000272852   | CPO        | W59STOP   | HET     | Novel       |
| c3         | 15468185  | GT   | G   | exon:ENST00000383782   | COLQ       | S285STOP  | HET     | Novel       |
| c3         | 16243990  | AC   | C   | exon:ENST00000388817   | GALNTL2    | S162STOP  | HET     | Known       |
| c3         | 139505118 | AG   | G   | exon:ENST00000383180   | TXNDC6     | Q171STOP  | HET     | Novel       |
| c3         | 150980779 | AG   | G   | exon:ENST00000383050   | N/A        | R130STOP  | HET     | Novel       |
| c4         | 12948066  | GA   | G   | exon:ENST00000382444   | HSP90AB2P  | W252STOP  | HET     | Novel       |
| c4         | 70933511  | AT   | T   | exon:ENST00000381057   | HTN3       | Y47STOP   | HET     | Known       |
| c4         | 77879853  | CA   | C   | exon:ENST00000296043   | SHROOM3    | Y501STOP  | HET     | Novel       |
| c4         | 102301286 | T    | C   | exon:ENST00000399145   | N/A        | Q115STOP  | HOM     | Known       |
| c5         | 1089962   | AC   | C   | exon:ENST00000382730   | NKD2       | S23STOP   | HET     | Known       |
| c5         | 1293757   | CG   | C   | exon:ENST00000324642   | SLC6A18    | Y319STOP  | HET     | Known       |
| c5         | 32185000  | AG   | G   | exon:ENST00000332294   | Q9UI72     | W17STOP   | HET     | Known       |
| c5         | 75000878  | A    | G   | exon:ENST00000344149   | N/A        | W419STOP  | HOM     | Known       |
| c5         | 134810349 | A    | T   | exon:ENST00000333591   | C5orf20    | R117STOP  | HOM     | Known       |
| c6         | 33156444  | T    | G   | exon:ENST00000395267   | HLA-DPB1   | G17STOP   | HOM     | Known       |
| c6         | 41210331  | T    | C   | exon:ENST00000338759   | Q6ZRD8     | R20STOP   | HOM     | Known       |
| c6         | 43032225  | A    | G   | exon:ENST00000326586   | Q5T8W0     | R74STOP   | HOM     | Known       |
| c6         | 57506229  | CT   | C   | exon:ENST00000389488   | PRIM2      | Q325STOP  | HET     | Known       |
| c6         | 74076059  | AG   | G   | exon:ENST00000370384   | C6orf148   | Q34STOP   | HET     | Known       |
| c6         | 139618237 | A    | G   | exon:ENST00000367652   | TXLNB      | Q123STOP  | HOM     | Known       |
| c6         | 150253727 | GA   | G   | exon:ENST00000367363   | RAET1E     | R2STOP    | HET     | Novel       |
| c6         | 154402262 | TC   | C   | exon:ENST00000330432   | OPRM1      | Q26STOP   | HET     | Known       |
| c6         | 160823771 | C    | G   | exon:ENST00000297289   | LPAL2      | Y69STOP   | HOM     | Novel       |
| c7         | 21549488  | TG   | G   | exon:ENST00000328843   | DNAH11     | E34STOP   | HET     | Known       |
| c7         | 39615800  | AG   | G   | exon:ENST00000357751   | Q8N8G3     | W43STOP   | HET     | Known       |
| c7         | 55508201  | GA   | G   | exon:ENST00000285279   | NM30796.3  | R83STOP   | HET     | Known       |
| c7         | 63806451  | A    | T   | exon:ENST00000344930   | ZNF107     | C778STOP  | HOM     | Novel       |
| c7         | 64076102  | AG   | G   | exon:ENST00000398695   | ZNF117     | R428STOP  | HET     | Known       |
| c7         | 80138385  | G    | T   | exon:ENST00000309881   | CD36       | Y325STOP  | HOM     | Known       |
| c7         | 99072835  | A    | T   | exon:ENST00000379712   | Q6ZVR2     | C18STOP   | HOM     | Known       |
| c7         | 138727857 | A    | T   | exon:ENST00000397584   | Q8WYX0     | L80STOP   | HOM     | Known       |
| c7         | 141589238 | A    | G   | exon:ENST00000389113   | N/A        | Q390STOP  | HOM     | Known       |
| c7         | 141918182 | T    | C   | exon:ENST00000390382   | TRBV7-9    | R55STOP   | HOM     | Novel       |
| c7         | 142459539 | TC   | C   | exon:ENST00000391508   | OR6V1      | Q80STOP   | HET     | Known       |
| c7         | 143995851 | TG   | G   | exon:ENST00000378099   | TPK1       | S24STOP   | HET     | Novel       |
| c7         | 149123706 | CT   | C   | exon:ENST00000262089   | Q76B61     | R1193STOP | HET     | Known       |
| c7         | 149153299 | G    | T   | exon:ENST00000378016   | NM198455.2 | L331STOP  | HOM     | Known       |

Table S9 (part 1 of 3)

| chromosome | position  | call | ref | exon info (ensembl id) | gene        | change   | hom/het | known/novel |
|------------|-----------|------|-----|------------------------|-------------|----------|---------|-------------|
| c8         | 222801    | CT   | C   | exon:ENST00000382855   | N/A         | Q133STOP | HET     | Novel       |
| c8         | 12480423  | TA   | T   | exon:ENST00000359701   | Q8NAJ9      | L30STOP  | HET     | Known       |
| c8         | 101791075 | CA   | C   | exon:ENST00000318607   | PABPC1      | E345STOP | HET     | Novel       |
| c9         | 19347166  | CT   | C   | exon:ENST00000380424   | DENND4C     | Q246STOP | HET     | Novel       |
| c9         | 44114866  | GC   | G   | exon:ENST00000377553   | Q8NGA9      | Y224STOP | HET     | Novel       |
| c9         | 45060265  | CA   | C   | exon:ENST00000377537   | Q6ZVI3      | C148STOP | HET     | Novel       |
| c9         | 66297827  | TG   | T   | exon:ENST00000359897   | Q6ZS19      | Y41STOP  | HET     | Known       |
| c9         | 125012928 | CA   | C   | exon:ENST00000398660   | N/A         | S87STOP  | HET     | Novel       |
| c9         | 134946938 | GT   | G   | exon:ENST00000314220   | Q8N7A6      | S57STOP  | HET     | Known       |
| c9         | 138754316 | AG   | G   | exon:ENST00000341040   | LCN10       | Q148STOP | HET     | Known       |
| c9         | 139057620 | A    | G   | exon:ENST00000371600   | NPDC1       | R25STOP  | HOM     | Known       |
| c10        | 38225046  | CA   | C   | exon:ENST00000374537   | N/A         | S190STOP | HET     | Novel       |
| c10        | 38934622  | CT   | C   | exon:ENST00000399687   | N/A         | R26STOP  | HET     | Novel       |
| c10        | 46825773  | AT   | T   | exon:ENST00000342900   | N/A         | L340STOP | HET     | Novel       |
| c10        | 47239426  | T    | C   | exon:ENST00000335083   | N/A         | R81STOP  | HOM     | Novel       |
| c10        | 73634249  | CG   | G   | exon:ENST00000394915   | ASCC1       | S78STOP  | HET     | Known       |
| c10        | 96437552  | AT   | T   | exon:ENST00000285979   | CYP2C18     | Y68STOP  | HET     | Known       |
| c10        | 126668082 | GA   | G   | exon:ENST00000337195   | CTBP2       | Q445STOP | HET     | Known       |
| c11        | 1662913   | C    | G   | exon:ENST00000382165   | FAM99A      | S25STOP  | HOM     | Novel       |
| c11        | 2278405   | TC   | C   | exon:ENST00000381153   | C11orf21    | W23STOP  | HET     | Novel       |
| c11        | 5733060   | AT   | A   | exon:ENST00000317254   | OR52N4      | R172STOP | HET     | Known       |
| c11        | 6107204   | GA   | G   | exon:ENST00000316517   | Q8NH77      | W263STOP | HET     | Novel       |
| c11        | 45029583  | GA   | G   | exon:ENST00000378793   | Q6ZS37      | R107STOP | HET     | Novel       |
| c11        | 48242807  | AT   | T   | exon:ENST00000320048   | OR4X1       | Y273STOP | HET     | Known       |
| c11        | 48303590  | GA   | G   | exon:ENST00000395239   | OR4C3       | W145STOP | HET     | Known       |
| c11        | 48344426  | GT   | G   | exon:ENST00000319813   | OR4C5       | Y56STOP  | HET     | Known       |
| c11        | 60021578  | CT   | C   | exon:ENST00000016913   | MS4A12      | Q71STOP  | HET     | Known       |
| c11        | 92781120  | TC   | C   | exon:ENST00000298050   | CCDC67      | R460STOP | HET     | Novel       |
| c11        | 104268327 | A    | G   | exon:ENST00000375726   | CASP12      | R125STOP | HOM     | Novel       |
| c11        | 123561942 | TG   | T   | exon:ENST00000318666   | Q8NH80      | Y252STOP | HET     | Known       |
| c12        | 3591206   | T    | A   | exon:ENST00000382608   | Q6UY24      | L71STOP  | HOM     | Known       |
| c12        | 50490305  | TA   | T   | exon:ENST00000313893   | Q8NBA4      | L27STOP  | HET     | Novel       |
| c12        | 54231266  | TC   | C   | exon:ENST00000394256   | OR6C4       | R5STOP   | HET     | Known       |
| c12        | 120699406 | A    | G   | exon:ENST00000333310   | Q9H9T1      | W5STOP   | HOM     | Novel       |
| c13        | 17941446  | CT   | C   | exon:ENST00000342944   | N/A         | W241STOP | HET     | Known       |
| c13        | 18897913  | A    | G   | exon:ENST00000341326   | TPTE2       | R324STOP | HOM     | Known       |
| c13        | 52020061  | TC   | C   | exon:ENST00000258589   | Q5JV89      | R138STOP | HET     | Novel       |
| c13        | 111076351 | AG   | G   | exon:ENST00000375713   | Q5T400      | W3STOP   | HET     | Novel       |
| c14        | 22668816  | GA   | G   | exon:ENST00000334354   | SLC7A8      | R179STOP | HET     | Known       |
| c14        | 24173254  | GA   | G   | exon:ENST00000382542   | GZMB        | Q19STOP  | HET     | Known       |
| c14        | 49872477  | C    | A   | exon:ENST00000356146   | CDKL1       | L989STOP | HOM     | Known       |
| c14        | 74228760  | GA   | G   | exon:ENST00000338772   | Q86TS6      | R95STOP  | HET     | Known       |
| c14        | 105161972 | T    | G   | exon:ENST00000390543   | IGHG4       | S290STOP | HOM     | Known       |
| c15        | 18726530  | T    | C   | exon:ENST00000400226   | LOC440368   | W124STOP | HOM     | Known       |
| c15        | 19000266  | CA   | C   | exon:ENST00000400222   | NM1001413.2 | E487STOP | HET     | Novel       |
| c15        | 53510174  | AC   | C   | exon:ENST00000321149   | DYX1C1      | E417STOP | HET     | Novel       |
| c15        | 67114791  | GA   | G   | exon:ENST00000388866   | NOX5        | W300STOP | HET     | Known       |
| c15        | 95102199  | TC   | C   | exon:ENST00000398303   | N/A         | R167STOP | HET     | Known       |
| c16        | 764474    | A    | G   | exon:ENST00000293892   | NP1020361.1 | Q590STOP | HOM     | Novel       |
| c16        | 977150    | CT   | C   | exon:ENST00000305973   | Q96S05      | Q39STOP  | HET     | Novel       |
| c16        | 1373566   | AG   | G   | exon:ENST00000397462   | UNKL        | Q744STOP | HET     | Novel       |
| c16        | 33537201  | AG   | G   | exon:ENST00000354689   | N/A         | W7STOP   | HET     | Known       |
| c16        | 33537474  | AG   | G   | exon:ENST00000354689   | N/A         | W66STOP  | HET     | Known       |
| c16        | 33868594  | GA   | G   | exon:ENST00000380143   | Q6PQ33      | R450STOP | HET     | Known       |
| c16        | 88172869  | CG   | C   | exon:ENST00000268720   | CPNE7       | S154STOP | HET     | Novel       |
| c16        | 88655877  | AG   | G   | exon:ENST00000325921   | Q9NQW5-2    | R73STOP  | HET     | Novel       |

Table S9 (part 2 of 3)

| chromosome | position  | call | ref | exon info (ensembl id) | gene        | change   | hom/het | known/novel |
|------------|-----------|------|-----|------------------------|-------------|----------|---------|-------------|
| c17        | 3142353   | TA   | T   | exon:ENST00000323404   | OR3A1       | K92STOP  | HET     | Known       |
| c17        | 4744490   | A    | G   | exon:ENST00000381365   | Q6ZR85      | W152STOP | HOM     | Known       |
| c17        | 20710491  | GT   | G   | exon:ENST00000327925   | NP1004306.1 | S178STOP | HET     | Known       |
| c17        | 21144803  | CT   | C   | exon:ENST00000342679   | MAP2K3      | Q102STOP | HET     | Known       |
| c17        | 36559089  | GA   | G   | exon:ENST00000343246   | KRTAP4-5    | R153STOP | HET     | Known       |
| c17        | 37237375  | C    | G   | exon:ENST00000393910   | NT5C3L      | S137STOP | HOM     | Known       |
| c17        | 64723626  | TG   | A   | exon:ENST00000269081   | ABCA10      | Y261STOP | HET     | other       |
| c17        | 70100401  | AC   | C   | exon:ENST00000328023   | C17orf77    | C207STOP | HET     | Known       |
| c18        | 50112154  | AC   | A   | exon:ENST00000307844   | STARD6      | L114STOP | HET     | Novel       |
| c19        | 776155    | TC   | C   | exon:ENST00000334630   | AZU1        | Q20STOP  | HET     | Novel       |
| c19        | 9098263   | GA   | G   | exon:ENST00000305444   | OR7G3       | R122STOP | HET     | Known       |
| c19        | 40410860  | T    | C   | exon:ENST00000324675   | TMEM162     | W188STOP | HOM     | Known       |
| c19        | 48463827  | GA   | G   | exon:ENST00000270077   | PSG9        | R127STOP | HET     | Novel       |
| c19        | 55246050  | GA   | G   | exon:ENST00000377006   | Q6ZNV3      | W93STOP  | HET     | Known       |
| c19        | 56822743  | GA   | G   | exon:ENST00000222107   | SIGLEC5     | R356STOP | HET     | Known       |
| c19        | 62334594  | A    | C   | exon:ENST00000391707   | USP29       | Y913STOP | HOM     | Known       |
| c19        | 63065900  | AT   | A   | exon:ENST00000396146   | Q9NWJ2      | R58STOP  | HET     | Novel       |
| c19        | 63785276  | TC   | C   | exon:ENST00000312426   | NP76428.2   | Q26STOP  | HET     | Known       |
| c20        | 25703913  | CA   | C   | exon:ENST00000376403   | Q5T319      | E15STOP  | HET     | Novel       |
| c20        | 26032175  | GA   | G   | exon:ENST00000356439   | C20orf191   | R81STOP  | HET     | Known       |
| c20        | 55497442  | AT   | A   | exon:ENST00000243919   | HMG1L1      | Y16STOP  | HET     | Known       |
| c21        | 27137937  | T    | C   | exon:ENST00000382884   | ADAMTS1     | W4STOP   | HOM     | Known       |
| c21        | 45588725  | GA   | G   | exon:ENST00000215202   | C21orf111   | Q188STOP | HET     | Known       |
| c22        | 15849049  | AC   | C   | exon:ENST00000400588   | GAB4        | G163STOP | HET     | Known       |
| c22        | 21037728  | CT   | C   | exon:ENST00000390293   | IGLV5-48    | Q106STOP | HET     | Novel       |
| c22        | 25398153  | TC   | C   | exon:ENST00000382641   | Q6ZVA3      | W143STOP | HET     | Known       |
| c22        | 34886714  | AG   | G   | exon:ENST00000349314   | APOL3       | Q58STOP  | HET     | Known       |
| c22        | 37900350  | CA   | C   | exon:ENST00000330414   | YV004       | G9STOP   | HET     | Known       |
| c22        | 41000237  | GT   | G   | exon:ENST00000332965   | Q8IXR4      | G223STOP | HET     | Known       |
| cX         | 30999550  | A    | C   | exon:ENST00000359202   | FTHL17      | E148STOP | HOM     | Known       |
| cX         | 118489029 | GT   | G   | exon:ENST00000317881   | SLC25A5     | E293STOP | HET     | Known       |
| cX         | 138492281 | C    | G   | exon:ENST00000370573   | MCF2        | S857STOP | HOM     | Novel       |
| cX         | 142795134 | G    | T   | exon:ENST00000370494   | UBE2NL      | L89STOP  | HOM     | Known       |
| cMT        | 9378      | A    | G   | exon:ENST00000391562   | Q14Y83      | W57STOP  | HOM     | Known       |

**Table S9 (part 3 of 3).** Coding SNPs predicted to cause premature termination of translation in NA18507. Note that this list excludes positions where the reference sequence also contains a termination codon within annotated coding sequence.
